# Supplementary material for: Lewis acid-promoted formation of benzoselenazole derivatives using SeO2 as a selenium source
Source: Royal Society of Chemistry journal article supplement (doi:10.1039/d1ob01070k), 2021-01-01

Electronic Supplementary Material (ESI) for Organic & Biomolecular  
Chemistry.  
This journal is © the Partner Organisations 2021

## Supporting Information

### Lewis acid-promoted formation of Benzoselenazole Derivatives using $\text{SeO}_2$ as a selenium source

Minhui Hu<sup>a,\*</sup> and Yaokun Ren<sup>b,\*</sup>

a. Law School, Nanjing University, Hankou Road 22, Nanjing City, Jiangsu 210093, China. E-mail: huminhui2015@163.com.

b. Pharmacy School, Jiangsu University, Xuefu Road 301, Zhenjiang City, Jiangsu 212013, China. E-mail: ryk1517030@163.com.

## Table of Contents

|                                                                 |     |
|-----------------------------------------------------------------|-----|
| General Information.....                                        | S3  |
| Experimental Procedure.....                                     | S3  |
| Characterization data of the products.....                      | S4  |
| Copies of $^1\text{H}$ NMR and $^{13}\text{C}$ NMR spectra..... | S12 |

## General Information

All reactions were carried out in round-bottom flasks; stirring was achieved with an oven-dried magnetic stirring bar. Solvents were purified by standard methods unless otherwise noted. Commercially available reagents were purchased from Aladdin Company in China and used throughout without further purification other than those detailed below. Flash column chromatography was performed on silica gel (200-300 mesh). All reactions were monitored by TLC analysis. Deuterated solvents were purchased from Cambridge Isotope laboratories.  $^1\text{H-NMR}$  and  $^{13}\text{C-NMR}$  spectra were recorded on a Bruker DRX-400 spectrometer operating at 400 MHz and 100 MHz respectively. HRMS spectrometry (LC-HRMS) was recorded on a LXQ Spectrometer (Thermo Scientific) operating on ESI-TOF (MeOH as a solvent).

## Experimental Procedure

### General procedure for selenization of $\text{SeO}_2$ as a selenium source without metal catalyst

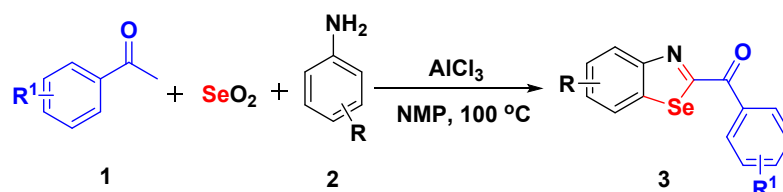

Aryl ketone (0.5 mmol, 1.0 equiv.),  $\text{SeO}_2$  (1.2 equiv.), arylaniline (1.2 equiv.) and  $\text{AlCl}_3$  (0.5 equiv.) were added to a round bottom flask with anhydrous NMP (0.5 mL). The mixture was stirred at  $100\text{ }^\circ\text{C}$  under reflux. After 12 hrs, the reaction was cooled to room temperature, extracted with ethyl acetate, dried over anhydrous  $\text{Na}_2\text{SO}_4$  and concentrated in vacuo. The residue was purified by silica gel flash chromatography (petroleum ether : EtOAc) to give product 3.

### General procedure for selenization of $\text{SeO}_2$ as a selenium source without metal catalyst

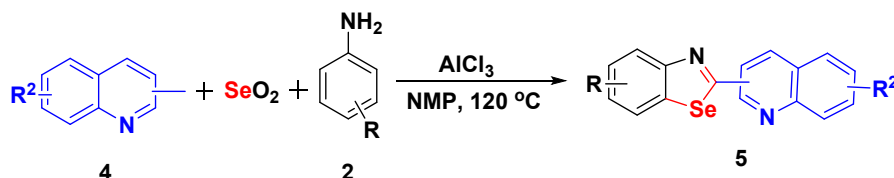

Quinoline (0.5 mmol, 1.0 equiv.),  $\text{SeO}_2$  (1.2 equiv.), arylaniline (1.2 equiv.) and  $\text{AlCl}_3$  (0.5 equiv.) were added to a round bottom flask with anhydrous NMP (0.5 mL). The mixture was stirred at  $120\text{ }^\circ\text{C}$  under reflux. After 12 hrs, the reaction was cooled to room temperature, extracted with ethyl acetate, dried over anhydrous  $\text{Na}_2\text{SO}_4$  and

concentrated in vacuo. The residue was purified by silica gel flash chromatography (petroleum ether : EtOAc) to give product **5**.

## Characterization data of the products

### (6-methylbenzo[d][1,3]selenazol-2-yl)(phenyl)methanone (**3a**)

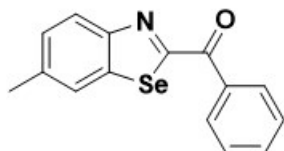

Yield 70%, yellow solid.

**<sup>1</sup>H NMR** (400 MHz, Chloroform-d)  $\delta$  8.69 - 8.48 (m, 2H), 8.19 (d,  $J$  = 8.4 Hz, 1H), 7.91 - 7.82 (m, 1H), 7.73 - 7.62 (m, 1H), 7.62 - 7.52 (m, 2H), 7.40 (dd,  $J$  = 8.4, 1.7 Hz, 1H), 2.53 (s, 3H). **<sup>13</sup>C NMR** (101 MHz, Chloroform-d)  $\delta$  186.26, 172.11, 154.11, 141.09, 138.13, 134.58, 133.75, 131.33, 128.57, 128.47, 126.96, 125.12, 21.70. **HRMS** (ESI-TOF)  $m/z$  calculated for  $C_{15}H_{12}NOSe^+$  302.0079 (M+H)<sup>+</sup>, found 302.0077.

### benzo[d][1,3]selenazol-2-yl(phenyl)methanone (**3b**)

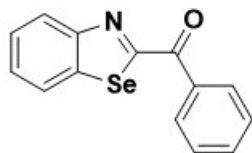

Yield 74%, yellow solid.

**<sup>1</sup>H NMR** (400 MHz, Chloroform-d)  $\delta$  8.66 - 8.50 (m, 2H), 8.32 (dd,  $J$  = 8.2, 1.1 Hz, 1H), 8.07 (dd,  $J$  = 8.0, 1.2 Hz, 1H), 7.80 - 7.66 (m, 1H), 7.66 - 7.55 (m, 3H), 7.51 - 7.48 (m, 1H). **<sup>13</sup>C NMR** (101 MHz, Chloroform-d)  $\delta$  186.20, 173.32, 155.96, 140.84, 134.44, 133.88, 131.39, 128.51, 127.50, 127.41, 126.84, 125.36. **HRMS** (ESI-TOF)  $m/z$  calculated for  $C_{14}H_{10}NOSe^+$  287.9922 (M+H)<sup>+</sup>, found 287.9917.

### (6-chlorobenzo[d][1,3]selenazol-2-yl)(phenyl)methanone (**3c**)

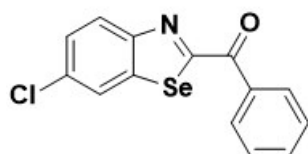

Yield 68%, yellow solid.

**<sup>1</sup>H NMR** (400 MHz, Chloroform-d)  $\delta$  8.64 - 8.51 (m, 2H), 8.21 (d, J = 8.7 Hz, 1H), 8.04 (d, J = 2.1 Hz, 1H), 7.74 - 7.65 (m, 1H), 7.65 - 7.49 (m, 3H). **<sup>13</sup>C NMR** (101 MHz, Chloroform-d)  $\delta$  185.78, 173.84, 154.44, 141.84, 134.19, 134.05, 133.88, 131.35, 128.56, 128.07, 127.80, 124.96. **HRMS** (ESI-TOF) m/z calculated for C<sub>14</sub>H<sub>9</sub>ClNOSe<sup>+</sup> 321.9532 (M+H)<sup>+</sup>, found 321.9537.

**(5-bromobenzo[d][1,3]selenazol-2-yl)(phenyl)methanone (3d)**

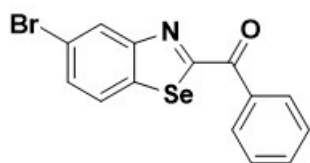

Yield 66%, orange solid.

**<sup>1</sup>H NMR** (400 MHz, Chloroform-d)  $\delta$  8.60 - 8.55 (m, 2H), 8.25 (dd, J = 8.2, 1.0 Hz, 1H), 7.75 - 7.67 (m, 1H), 7.60 (q, J = 7.5 Hz, 3H), 7.48 (t, J = 7.9 Hz, 1H). **<sup>13</sup>C NMR** (101 MHz, Chloroform-d)  $\delta$  185.95, 173.78, 155.05, 144.86, 134.09, 134.07, 131.41, 129.81, 128.57, 128.01, 126.16, 117.64. **HRMS** (ESI-TOF) m/z calculated for C<sub>14</sub>H<sub>9</sub>BrNOSe<sup>+</sup> 365.9027 (M+H)<sup>+</sup>, found 365.9026.

**(6-methylbenzo[d][1,3]selenazol-2-yl)(p-tolyl)methanone (3e)**

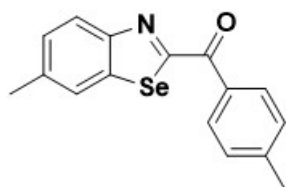

Yield 73%, yellow solid.

**<sup>1</sup>H NMR** (400 MHz, Chloroform-d)  $\delta$  8.59 - 8.39 (m, 2H), 8.18 (d, J = 8.3 Hz, 1H), 7.84 (d, J = 1.6 Hz, 1H), 7.47 - 7.31 (m, 3H), 2.51 (s, 3H), 2.48 (s, 3H). **<sup>13</sup>C NMR** (101 MHz, Chloroform-d)  $\delta$  185.71, 172.50, 154.13, 144.80, 141.03, 137.96, 131.98, 131.48, 129.24, 128.48, 126.89, 125.10, 21.85, 21.69. **HRMS** (ESI-TOF) m/z calculated for C<sub>16</sub>H<sub>14</sub>NOSe<sup>+</sup> 316.0235 (M+H)<sup>+</sup>, found 316.0235.

**(4-methoxyphenyl)(6-methylbenzo[d][1,3]selenazol-2-yl)methanone (3f)**

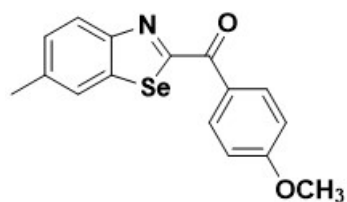

Yield 72%, yellow solid.

**<sup>1</sup>H NMR** (400 MHz, Chloroform-d) δ 8.72 - 8.57 (m, 2H), 8.17 (d, J = 8.3 Hz, 1H), 7.85 (dt, J = 1.7, 0.8 Hz, 1H), 7.39 (dd, J = 8.4, 1.7 Hz, 1H), 7.12 - 6.96 (m, 2H), 3.94 (s, 3H), 2.52 (s, 3H). **<sup>13</sup>C NMR** (101 MHz, Chloroform-d) δ 184.29, 173.00, 164.31, 154.13, 140.92, 137.83, 133.88, 128.42, 127.32, 126.75, 125.09, 113.87, 55.56, 21.68. **HRMS** (ESI-TOF) m/z calculated for C<sub>16</sub>H<sub>13</sub>NNaO<sub>2</sub>Se<sup>+</sup> 354.0004 (M+Na)<sup>+</sup>, found 354.0007.

**(4-chlorophenyl)(6-methylbenzo[d][1,3]selenazol-2-yl)methanone (3g)**

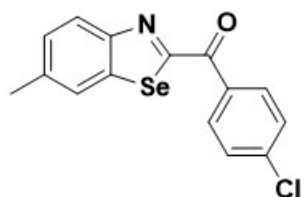

Yield 64%, yellow solid.

**<sup>1</sup>H NMR** (400 MHz, Chloroform-d) δ 8.65 - 8.46 (m, 2H), 8.17 (d, J = 8.4 Hz, 1H), 7.93 - 7.73 (m, 1H), 7.63 - 7.49 (m, 2H), 7.40 (dd, J = 8.4, 1.7 Hz, 1H), 2.52 (s, 3H). **<sup>13</sup>C NMR** (101 MHz, Chloroform-d) δ 184.89, 171.76, 154.02, 141.16, 140.44, 138.33, 132.84, 132.76, 128.82, 128.69, 126.98, 125.13, 21.72. **HRMS** (ESI-TOF) m/z calculated for C<sub>15</sub>H<sub>11</sub>ClNOSe<sup>+</sup> 335.9689 (M+H)<sup>+</sup>, found 335.9689.

**(6-bromobenzo[d][1,3]selenazol-2-yl)(4-methoxyphenyl)methanone (3h)**

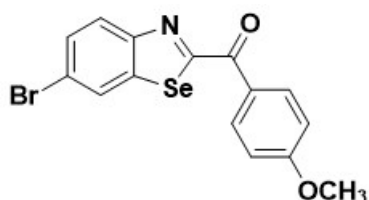

Yield 67%, yellow solid.

**<sup>1</sup>H NMR** (400 MHz, Chloroform-d) δ 8.71 - 8.59 (m, 2H), 8.19 (d, J = 1.9 Hz, 1H), 8.13 (d, J = 8.7 Hz, 1H), 7.68 (dd, J = 8.7, 2.0 Hz, 1H), 7.16 - 6.98 (m, 2H), 3.95 (s,

3H). <sup>13</sup>C NMR (101 MHz, Chloroform-d) δ 183.74, 174.85, 164.56, 154.79, 142.17, 133.94, 130.36, 128.20, 127.88, 126.92, 121.68, 113.98, 55.60. **HRMS** (ESI-TOF) m/z calculated for C<sub>15</sub>H<sub>11</sub>BrNO<sub>2</sub>Se<sup>+</sup> 395.9133 (M+H)<sup>+</sup>, found 385.9121.

**(6-methylbenzo[d][1,3]selenazol-2-yl)(m-tolyl)methanone (3i)**

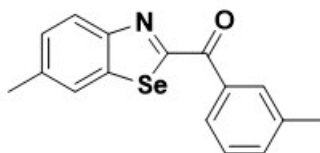

Yield 71%, yellow solid.

<sup>1</sup>H NMR (400 MHz, Chloroform-d) δ 8.39 (dt, J = 6.8, 1.8 Hz, 1H), 8.29 (p, J = 0.9 Hz, 1H), 8.19 (d, J = 8.4 Hz, 1H), 7.90 - 7.77 (m, 1H), 7.54 - 7.43 (m, 2H), 7.39 (dd, J = 8.4, 1.7 Hz, 1H), 2.53 (s, 3H), 2.50 (s, 3H). <sup>13</sup>C NMR (101 MHz, Chloroform-d) δ 186.53, 172.24, 154.09, 141.06, 138.25, 138.06, 134.59, 131.52, 128.70, 128.53, 128.36, 126.96, 125.11, 21.70, 21.47. **HRMS** (ESI-TOF) m/z calculated for C<sub>16</sub>H<sub>14</sub>NOSe<sup>+</sup> 316.0235 (M+H)<sup>+</sup>, found 316.0233.

**benzo[d][1,3]selenazol-2-yl(4-chlorophenyl)methanone (3j)**

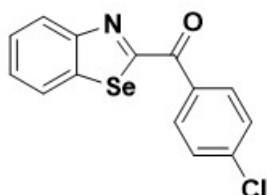

Yield 69%, yellow solid.

<sup>1</sup>H NMR (400 MHz, Chloroform-d) δ 8.62 - 8.54 (m, 2H), 8.31 (dd, J = 8.2, 1.2 Hz, 1H), 8.10 - 8.03 (m, 1H), 7.65 - 7.53 (m, 3H), 7.49 (ddd, J = 8.3, 7.2, 1.3 Hz, 1H). <sup>13</sup>C NMR (101 MHz, Chloroform-d) δ 184.87, 172.98, 155.88, 140.90, 140.61, 132.81, 132.72, 128.88, 127.57, 127.53, 126.95, 125.38. **HRMS** (ESI-TOF) m/z calculated for C<sub>14</sub>H<sub>9</sub>ClNOSe<sup>+</sup> 321.9532 (M+H)<sup>+</sup>, found 321.9534.

**(6-methylbenzo[d][1,3]selenazol-2-yl)(4-nitrophenyl)methanone (3k)**

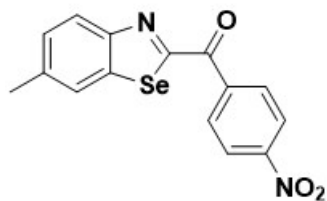

Yield 47%, yellow solid.

**<sup>1</sup>H NMR** (400 MHz, Chloroform-d)  $\delta$  8.87 - 8.62 (m, 2H), 8.51 - 8.30 (m, 2H), 8.20 (d,  $J$  = 8.4 Hz, 1H), 7.89 (dt,  $J$  = 1.8, 0.8 Hz, 1H), 7.44 (dd,  $J$  = 8.4, 1.7 Hz, 1H), 2.55 (s, 3H). **<sup>13</sup>C NMR** (101 MHz, Chloroform-d)  $\delta$  184.82, 170.67, 153.98, 150.53, 141.42, 139.45, 138.92, 132.31, 129.01, 127.20, 125.20, 123.44, 21.77. **HRMS** (ESI-TOF)  $m/z$  calculated for  $C_{15}H_{10}N_2NaO_3Se^+$  368.9749 (M+H)<sup>+</sup>, found 368.9742.

### (6-chlorobenzod[e][1,3]selenazol-2-yl)(o-tolyl)methanone (3l)

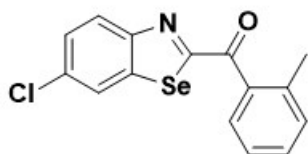

Yield 57%, yellow solid.

**<sup>1</sup>H NMR** (400 MHz, Chloroform-d)  $\delta$  8.15 (d,  $J$  = 8.7 Hz, 1H), 8.10 - 7.99 (m, 2H), 7.57 - 7.46 (m, 2H), 7.38 (ddd,  $J$  = 8.8, 5.9, 1.5 Hz, 2H), 2.55 (s, 3H). **<sup>13</sup>C NMR** (101 MHz, Chloroform-d)  $\delta$  189.67, 174.33, 154.34, 142.00, 139.31, 134.37, 133.90, 132.16, 131.62, 131.48, 128.16, 127.81, 125.35, 125.02, 20.79. **HRMS** (ESI-TOF)  $m/z$  calculated for  $C_{15}H_{11}ClNOSe^+$  335.9689 (M+H)<sup>+</sup>, found 335.9686.

### 6-methyl-2-(quinolin-2-yl)benzo[d][1,3]selenazole (5a)

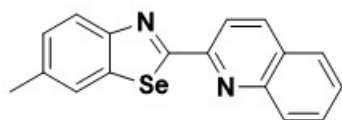

Yield 55%, white solid.

**<sup>1</sup>H NMR** (400 MHz, Chloroform-d)  $\delta$  8.44 (d,  $J$  = 8.5 Hz, 1H), 8.33 - 8.26 (m, 1H), 8.22 - 8.16 (m, 1H), 8.07 (d,  $J$  = 8.3 Hz, 1H), 7.93 - 7.82 (m, 2H), 7.78 (ddd,  $J$  = 8.4, 6.8, 1.4 Hz, 1H), 7.61 (ddd,  $J$  = 8.0, 6.8, 1.2 Hz, 1H), 7.34 (dd,  $J$  = 8.4, 1.7 Hz, 1H), 2.52 (s, 3H). **<sup>13</sup>C NMR** (101 MHz, Chloroform-d)  $\delta$  174.33, 154.48, 153.12, 148.11, 139.54, 136.89, 136.12, 130.03, 129.66, 129.05, 127.81, 127.72, 127.46, 125.16,



124.87, 117.58, 21.53. **HRMS** (ESI-TOF)  $m/z$  calculated for  $C_{17}H_{13}N_2Se^+$  325.0238 (M+H)<sup>+</sup>, found 325.0237.

### 2-(quinolin-2-yl)benzo[d][1,3]selenazole (5b)

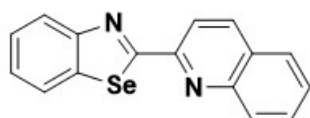

Yield 52%, white solid.

**<sup>1</sup>H NMR** (400 MHz, Chloroform-d)  $\delta$  8.44 (dd,  $J = 19.2, 8.5$  Hz, 1H), 8.31 (d,  $J = 8.5$  Hz, 1H), 8.20 (dd,  $J = 8.4, 4.7$  Hz, 2H), 8.04 (d,  $J = 7.9$  Hz, 1H), 7.89 (d,  $J = 8.1$  Hz, 1H), 7.79 (ddd,  $J = 8.5, 6.8, 1.6$  Hz, 1H), 7.62 (t,  $J = 7.5$  Hz, 1H), 7.59 - 7.49 (m, 1H), 7.39 (t,  $J = 7.7$  Hz, 1H). **<sup>13</sup>C NMR** (101 MHz, Chloroform-d)  $\delta$  175.56, 156.41, 152.99, 148.12, 139.43, 136.96, 130.07, 129.70, 129.13, 127.73, 127.57, 126.25, 125.79, 125.42, 125.25, 117.61. **HRMS** (ESI-TOF)  $m/z$  calculated for  $C_{16}H_{10}N_2NaSe^+$  332.9901 (M+H)<sup>+</sup>, found 332.9899.

### 6-methoxy-2-(quinolin-2-yl)benzo[d][1,3]selenazole (5c)

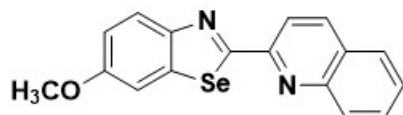

Yield 58%, white solid.

**<sup>1</sup>H NMR** (400 MHz, Chloroform-d)  $\delta$  8.41 (d,  $J = 8.5$  Hz, 1H), 8.28 (dd,  $J = 8.6, 0.8$  Hz, 1H), 8.18 (dq,  $J = 8.5, 0.8$  Hz, 1H), 8.06 (d,  $J = 8.9$  Hz, 1H), 7.92 - 7.84 (m, 1H), 7.77 (ddd,  $J = 8.5, 6.9, 1.5$  Hz, 1H), 7.60 (ddd,  $J = 8.1, 6.8, 1.2$  Hz, 1H), 7.51 (d,  $J = 2.6$  Hz, 1H), 7.12 (dd,  $J = 8.9, 2.6$  Hz, 1H), 3.94 (s, 3H). **<sup>13</sup>C NMR** (101 MHz, Chloroform-d)  $\delta$  172.51, 158.14, 153.11, 150.92, 148.11, 140.90, 136.84, 130.00, 129.58, 128.94, 127.72, 127.35, 125.79, 117.47, 115.25, 108.00, 55.78. **HRMS** (ESI-TOF)  $m/z$  calculated for  $C_{17}H_{13}N_2OSe^+$  341.0188 (M+H)<sup>+</sup>, found 341.0188.

### 6-methoxy-2-(6-methylquinolin-2-yl)benzo[d][1,3]selenazole (5d)

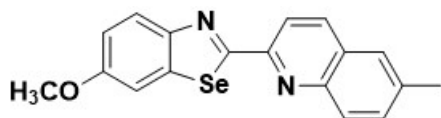

Yield 60%, white solid.

**<sup>1</sup>H NMR** (400 MHz, Chloroform-d)  $\delta$  8.36 (d,  $J$  = 8.5 Hz, 1H), 8.25 - 8.11 (m, 1H), 8.06 (dd,  $J$  = 8.8, 7.0 Hz, 2H), 7.67 - 7.53 (m, 2H), 7.50 (d,  $J$  = 2.6 Hz, 1H), 7.11 (dd,  $J$  = 8.9, 2.6 Hz, 1H), 3.93 (s, 3H), 2.57 (s, 3H). **<sup>13</sup>C NMR** (101 MHz, Chloroform-d)  $\delta$  172.71, 158.06, 152.31, 150.94, 146.71, 140.77, 137.48, 136.08, 132.28, 129.25, 128.99, 126.60, 125.68, 117.47, 115.14, 108.03, 55.77, 21.72. **HRMS** (ESI-TOF)  $m/z$  calculated for  $C_{18}H_{15}N_2OSe^+$  355.0344 (M+H)<sup>+</sup>, found 355.0342.

#### 6-methyl-2-(quinolin-4-yl)benzo[d][1,3]selenazole (5e)

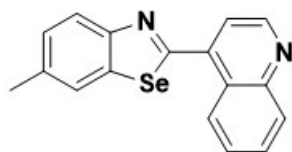

Yield 90%, white solid.

**<sup>1</sup>H NMR** (400 MHz, Chloroform-d)  $\delta$  9.09 - 8.94 (m, 2H), 8.22 (dd,  $J$  = 8.4, 1.2 Hz, 1H), 8.16 (d,  $J$  = 8.3 Hz, 1H), 7.87 - 7.75 (m, 2H), 7.76 - 7.64 (m, 2H), 7.39 (dd,  $J$  = 8.3, 1.7 Hz, 1H), 2.53 (s, 3H). **<sup>13</sup>C NMR** (101 MHz, Chloroform-d)  $\delta$  167.72, 153.92, 149.84, 149.26, 140.75, 139.40, 136.53, 129.92, 129.88, 128.26, 128.04, 126.13, 125.17, 124.60, 124.45, 122.49, 21.54. **HRMS** (ESI-TOF)  $m/z$  calculated for  $C_{17}H_{13}N_2Se^+$  325.0238 (M+H)<sup>+</sup>, found 325.0234.

#### 6-methoxy-2-(quinolin-4-yl)benzo[d][1,3]selenazole (5f)

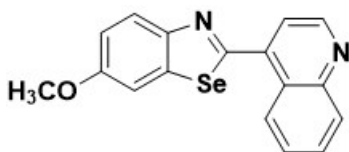

Yield 96%, white solid.

**<sup>1</sup>H NMR** (400 MHz, Chloroform-d)  $\delta$  9.15 - 8.95 (m, 2H), 8.29 - 8.10 (m, 2H), 7.80 (ddd,  $J$  = 8.4, 6.8, 1.5 Hz, 1H), 7.77 - 7.60 (m, 2H), 7.48 (d,  $J$  = 2.6 Hz, 1H), 7.17 (dd,  $J$  = 8.9, 2.6 Hz, 1H), 3.93 (s, 3H). **<sup>13</sup>C NMR** (101 MHz, Chloroform-d)  $\delta$  165.85, 158.31, 150.36, 149.85, 149.27, 140.66, 140.61, 129.90, 129.87, 128.01, 126.17, 126.07, 124.41, 122.43, 115.62, 107.55, 55.85. **HRMS** (ESI-TOF)  $m/z$  calculated for  $C_{17}H_{13}N_2OSe^+$  341.0188 (M+H)<sup>+</sup>, found 341.0185.

### 6-chloro-2-(quinolin-4-yl)benzo[d][1,3]selenazole (5g)

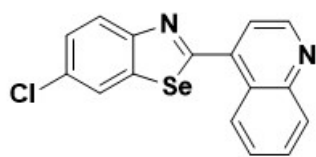

Yield 85%, white solid.

$^1\text{H NMR}$  (400 MHz, Chloroform-*d*)  $\delta$  9.05 (d,  $J = 4.5$  Hz, 1H), 8.97 (dd,  $J = 8.5, 1.4$  Hz, 1H), 8.33 - 8.11 (m, 2H), 8.02 (d,  $J = 2.1$  Hz, 1H), 7.84 (ddd,  $J = 8.4, 6.8, 1.5$  Hz, 1H), 7.79 - 7.66 (m, 2H), 7.56 (dd,  $J = 8.7, 2.1$  Hz, 1H).  $^{13}\text{C NMR}$  (101 MHz, Chloroform-*d*)  $\delta$  169.47, 154.28, 149.83, 149.27, 140.23, 140.19, 132.30, 130.09, 129.98, 128.25, 127.56, 126.28, 125.89, 124.40, 124.23, 122.57. **HRMS** (ESI-TOF)  $m/z$  calculated for  $\text{C}_{16}\text{H}_{10}\text{ClN}_2\text{Se}^+$  344.9692 ( $\text{M}+\text{H}^+$ ), found 344.9692.

### 6-bromo-2-(quinolin-4-yl)benzo[d][1,3]selenazole (5h)

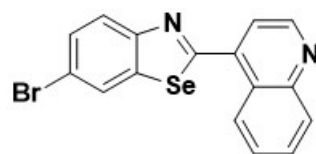

Yield 87%, pale yellow solid.

$^1\text{H NMR}$  (400 MHz, Chloroform-*d*)  $\delta$  9.05 (d,  $J = 4.5$  Hz, 1H), 8.96 (dd,  $J = 8.5, 1.4$  Hz, 1H), 8.31 - 7.96 (m, 3H), 7.83 (ddd,  $J = 8.4, 6.8, 1.3$  Hz, 1H), 7.79 - 7.50 (m, 3H).  $^{13}\text{C NMR}$  (101 MHz, Chloroform-*d*)  $\delta$  169.58, 154.58, 149.83, 149.28, 140.71, 140.15, 130.29, 130.09, 129.99, 128.26, 127.30, 126.66, 125.89, 124.22, 122.56, 120.18. **HRMS** (ESI-TOF)  $m/z$  calculated for  $\text{C}_{16}\text{H}_{10}\text{BrN}_2\text{Se}^+$  388.9187 ( $\text{M}+\text{H}^+$ ), found 388.9185.

### 4-methyl-2-(quinolin-4-yl)benzo[d][1,3]selenazole (5i)

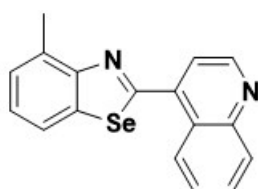

Yield 88%, white solid.

**<sup>1</sup>H NMR** (400 MHz, Chloroform-d)  $\delta$  9.16 - 8.98 (m, 2H), 8.23 (dd, J = 8.4, 1.3 Hz, 1H), 7.94 - 7.78 (m, 2H), 7.80 - 7.64 (m, 2H), 7.46 - 7.29 (m, 2H), 2.92 (s, 3H). **<sup>13</sup>C NMR** (101 MHz, Chloroform-d)  $\delta$  167.53, 155.15, 149.87, 149.34, 140.81, 139.25, 135.80, 129.90, 129.89, 128.05, 127.36, 126.25, 126.21, 124.45, 122.64, 122.15, 19.44. **HRMS** (ESI-TOF) m/z calculated for C<sub>17</sub>H<sub>13</sub>N<sub>2</sub>Se<sup>+</sup> 325.0238 (M+H)<sup>+</sup>, found 325.0241.

# Copies of $^1\text{H}$ NMR and $^{13}\text{C}$ NMR spectra

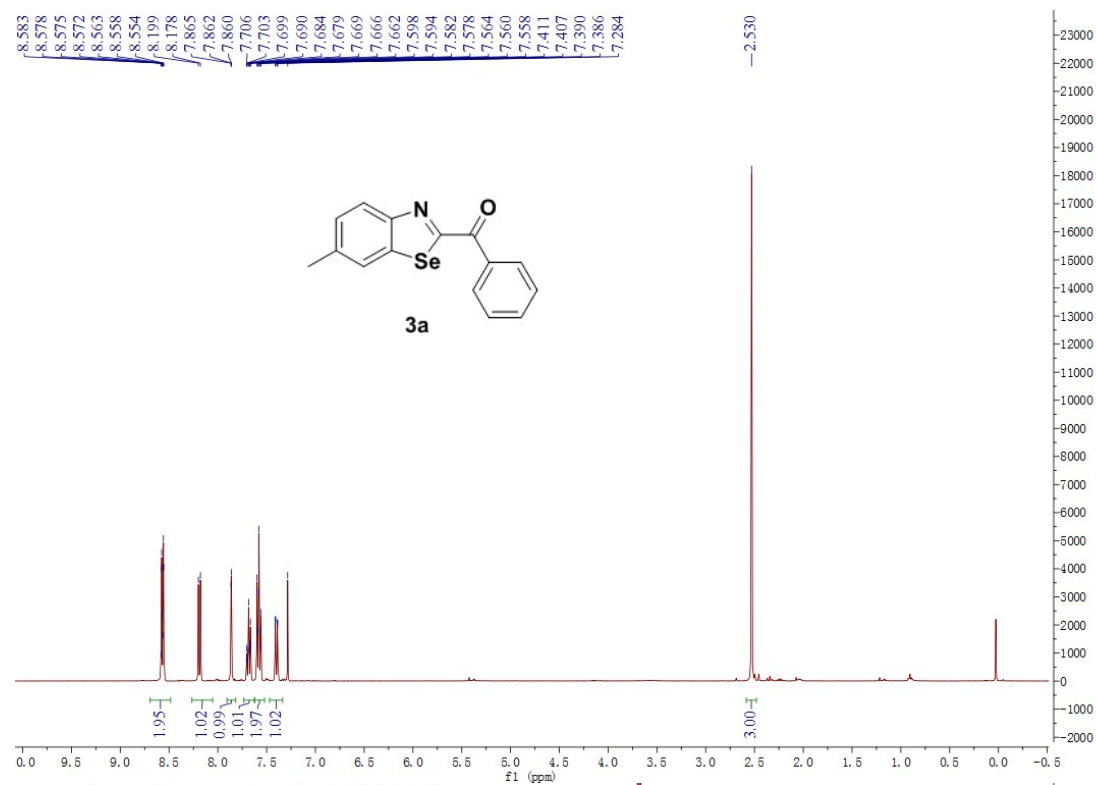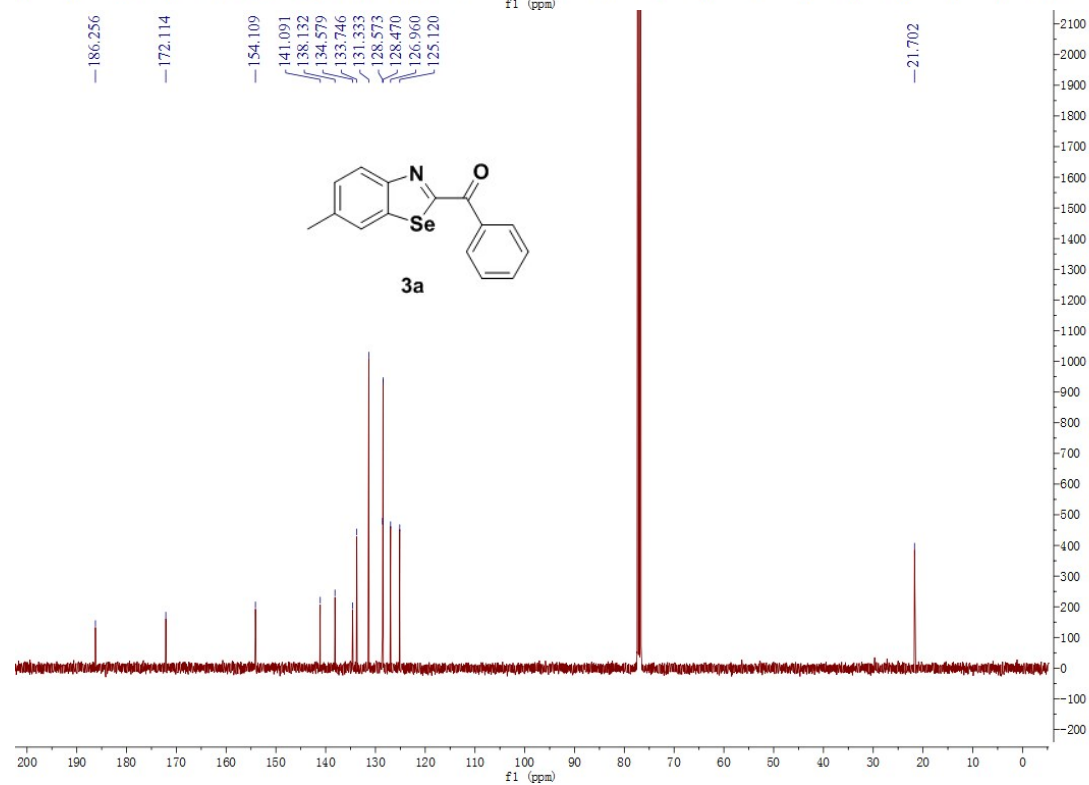

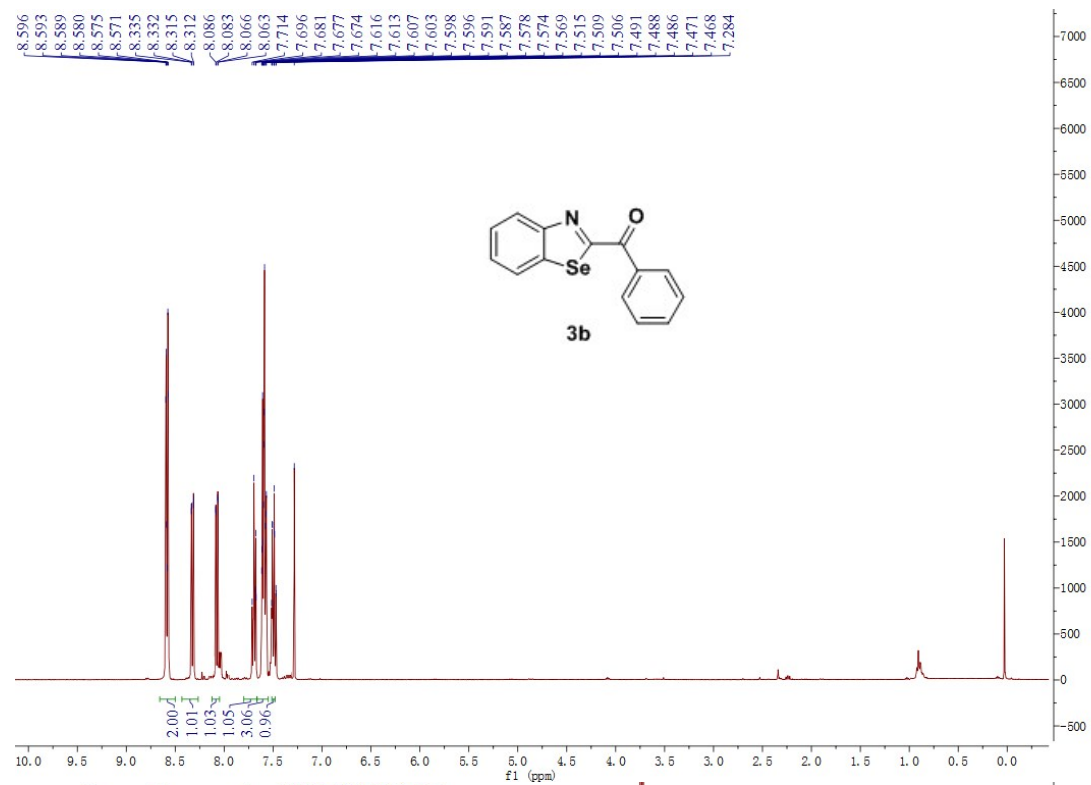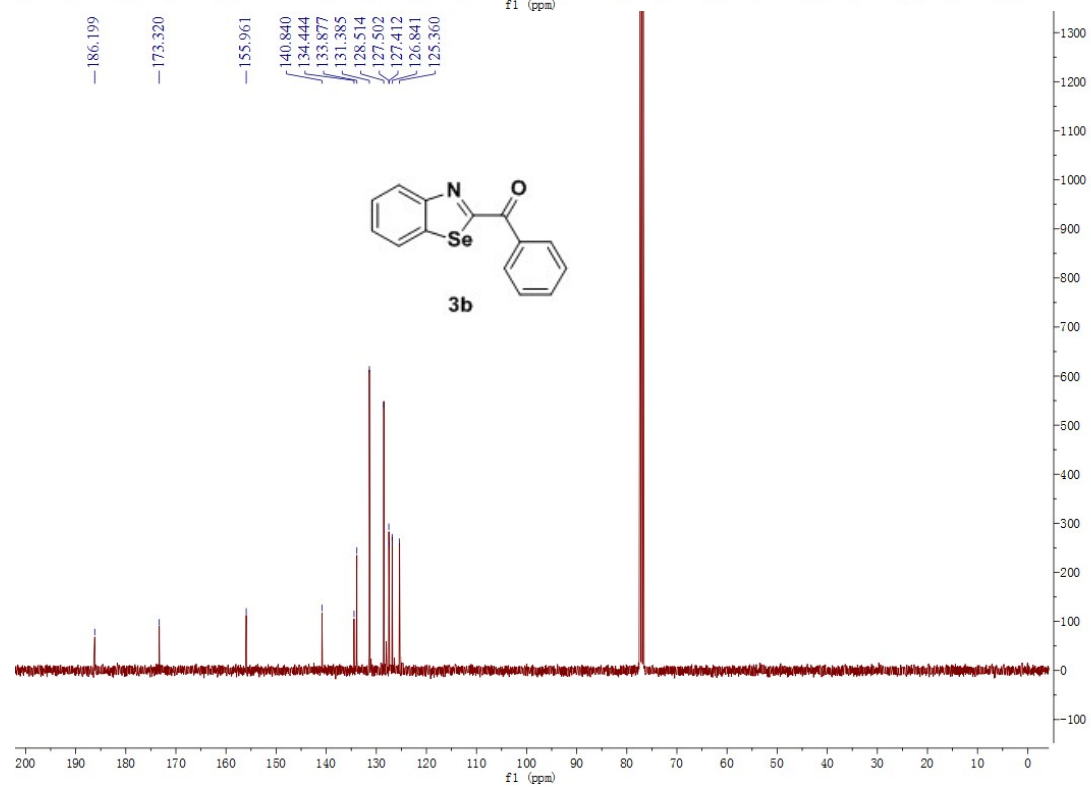

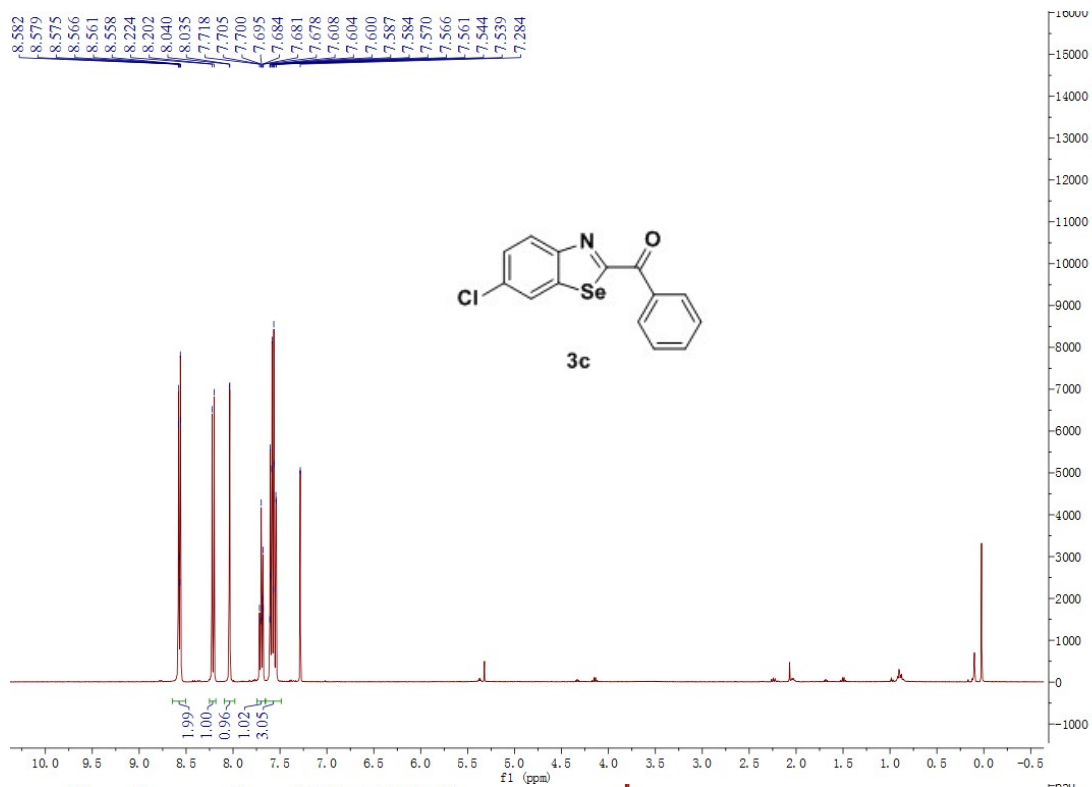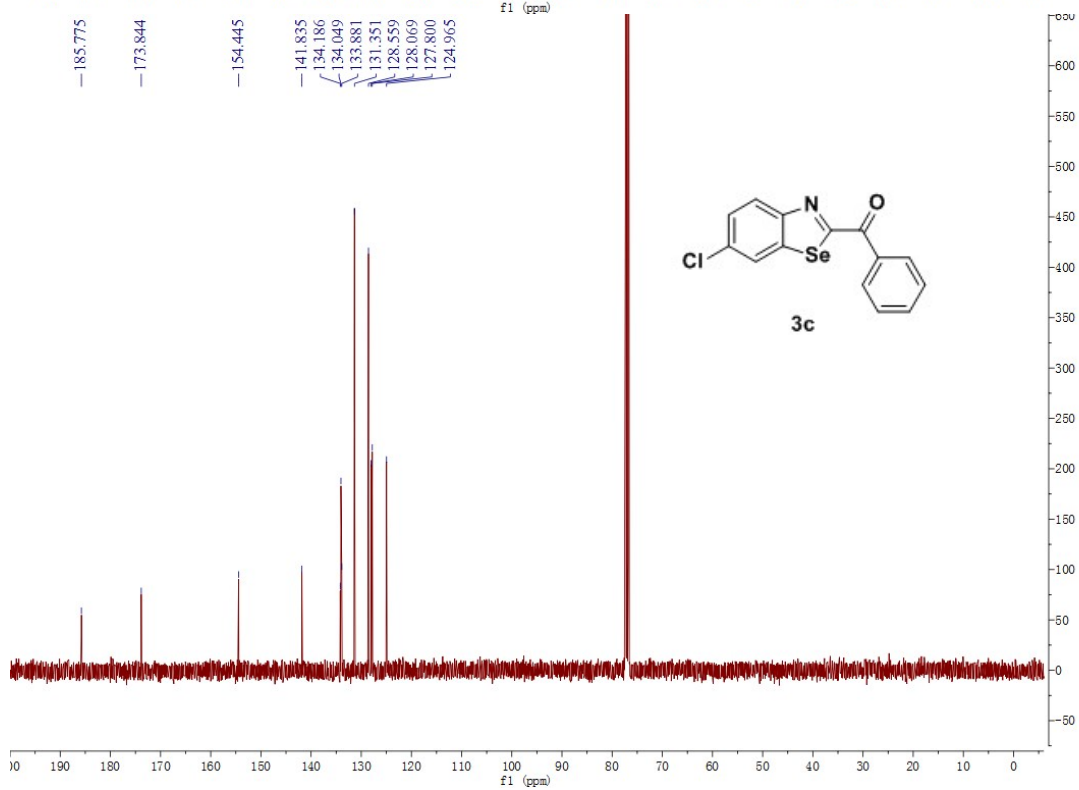

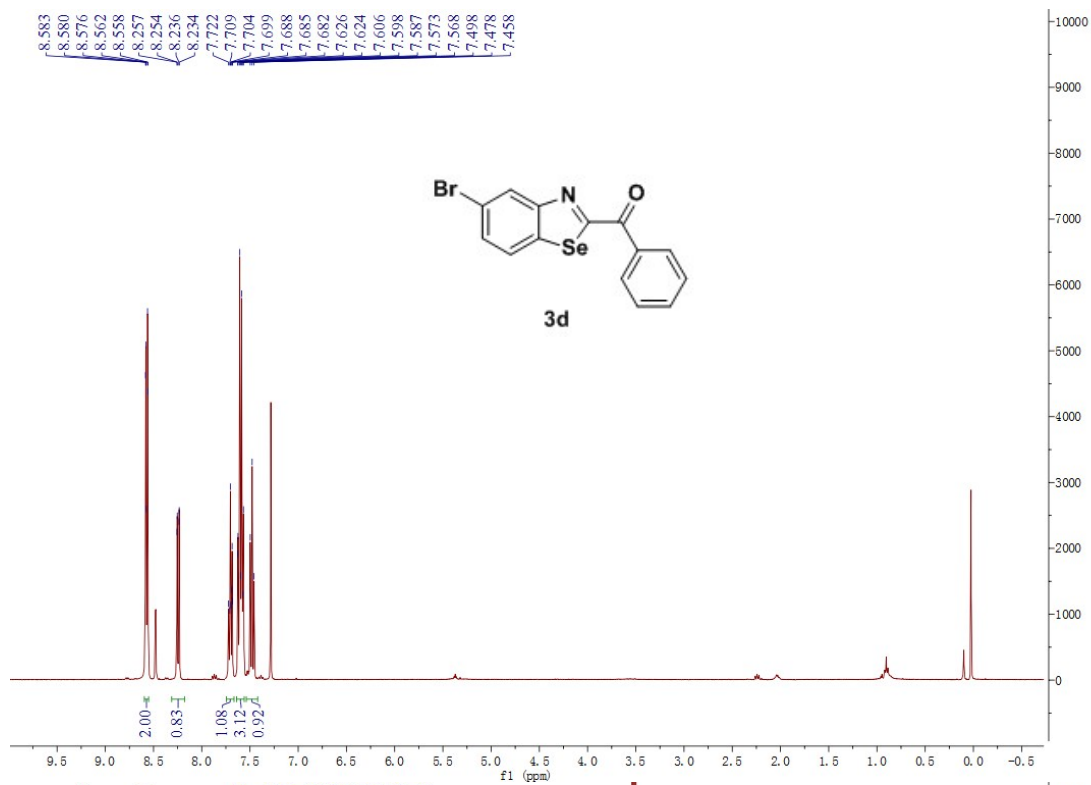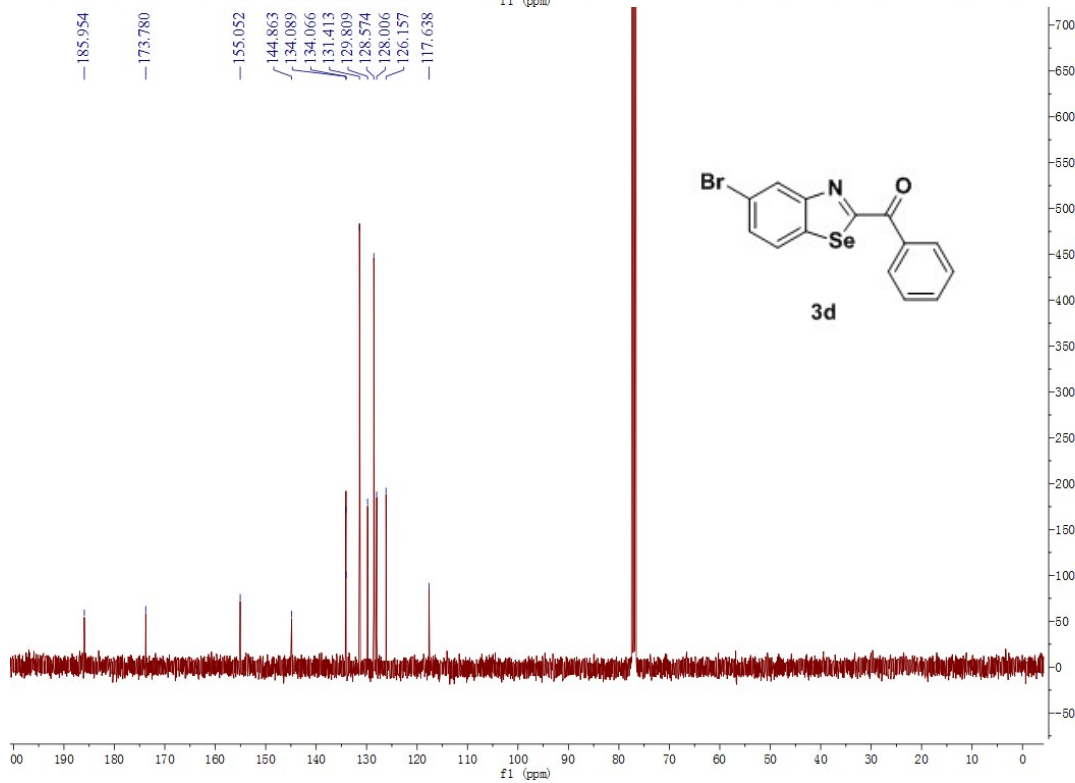



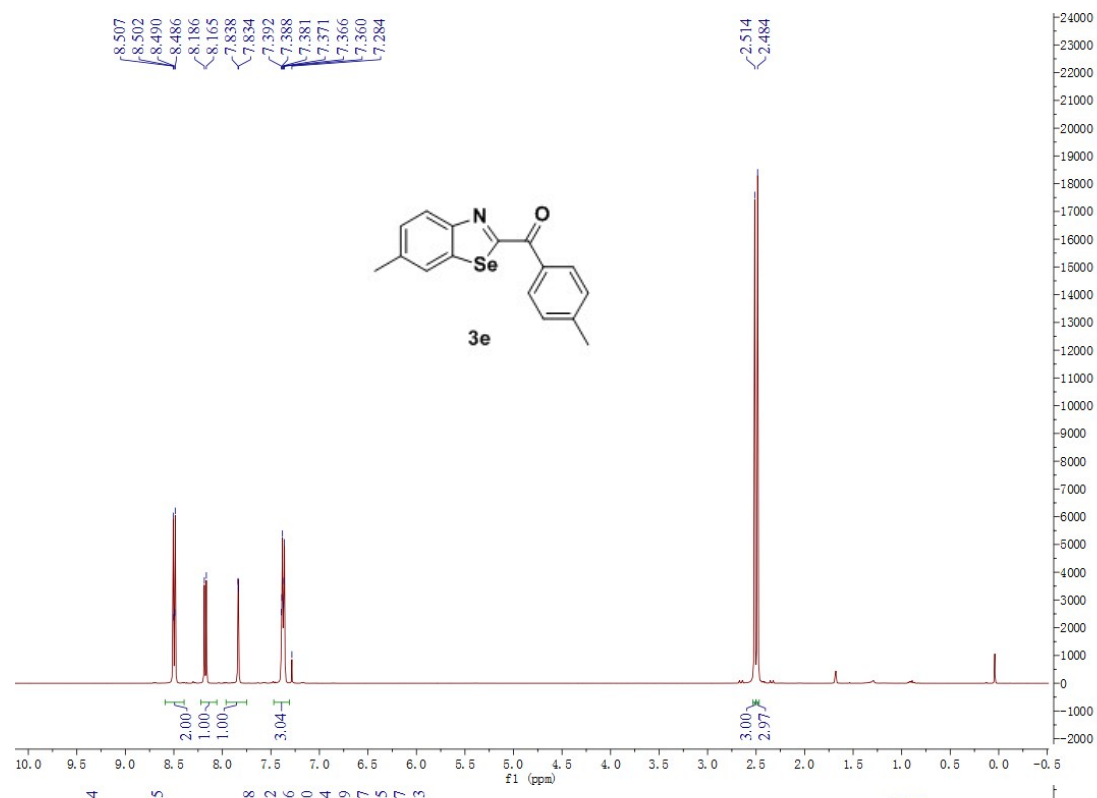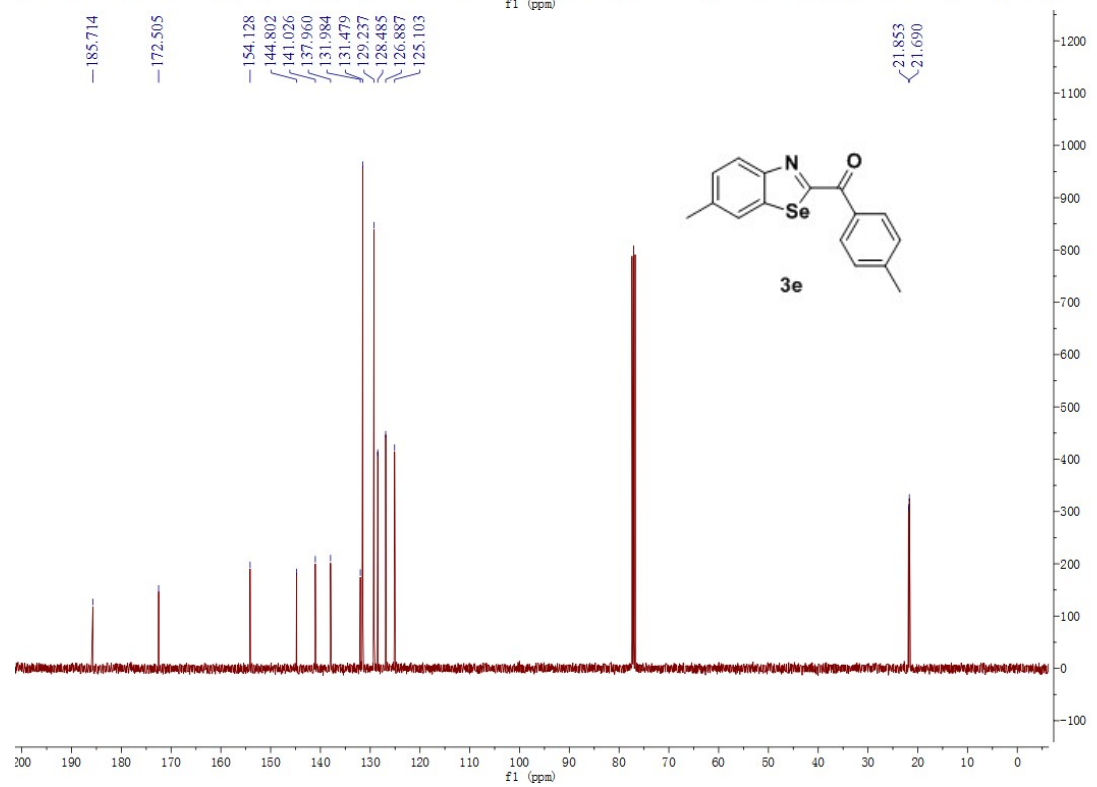

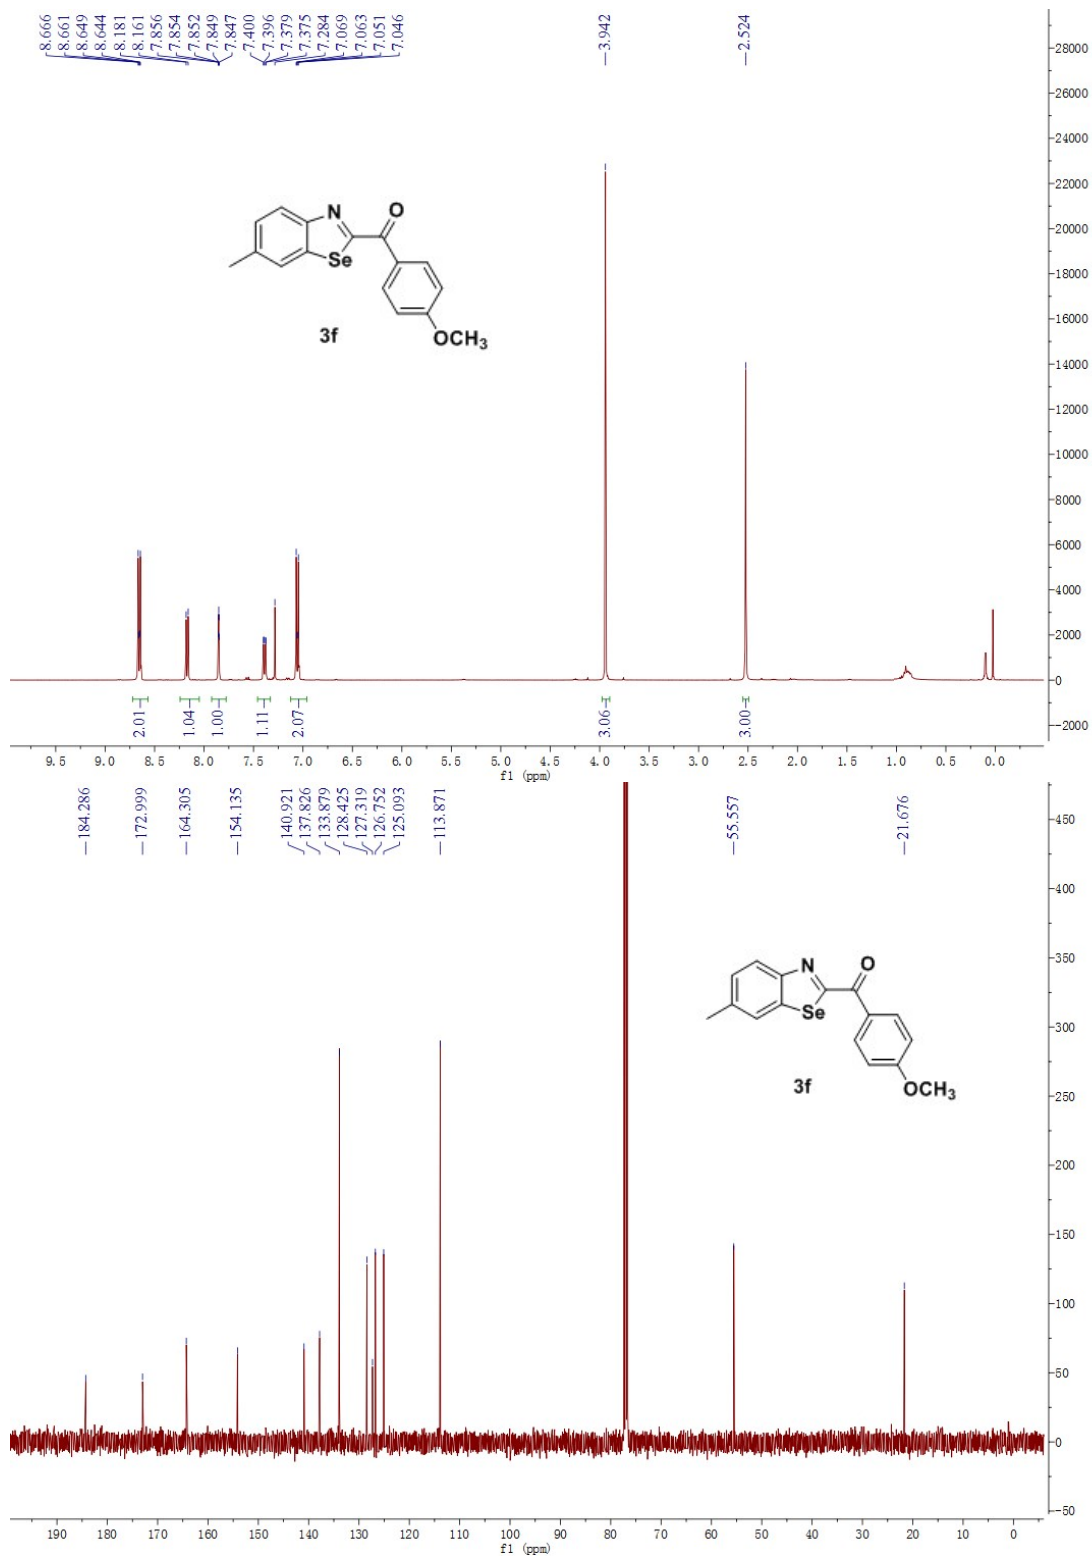

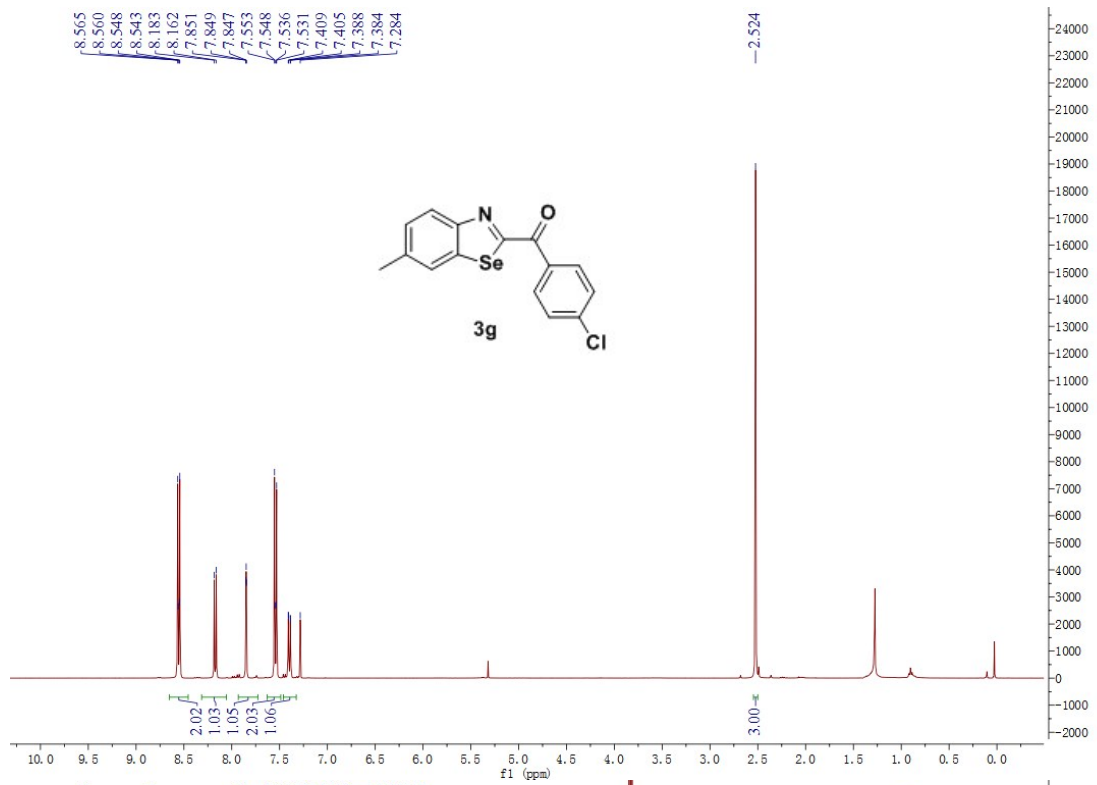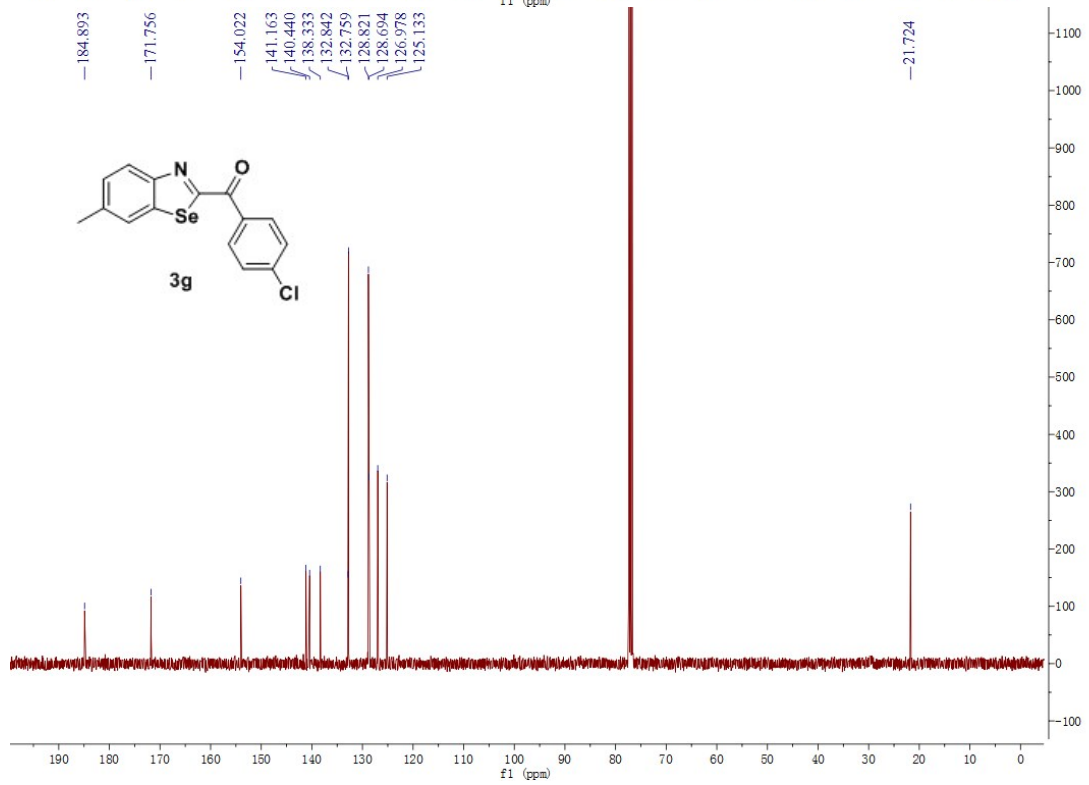

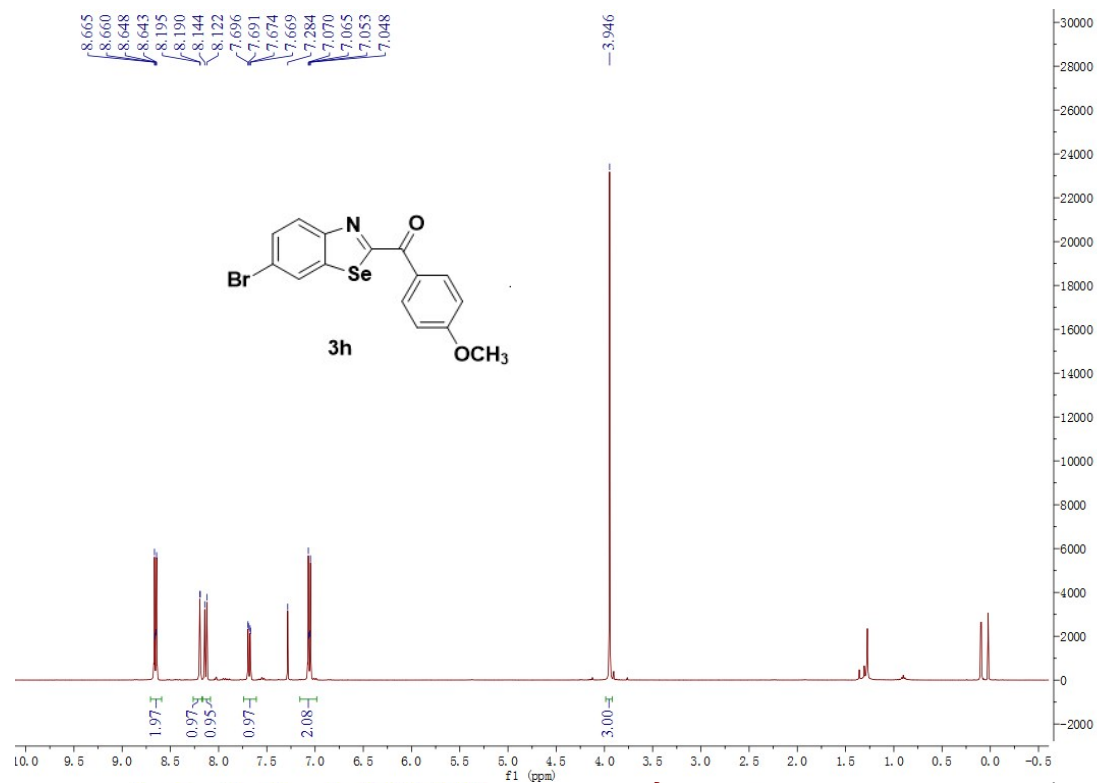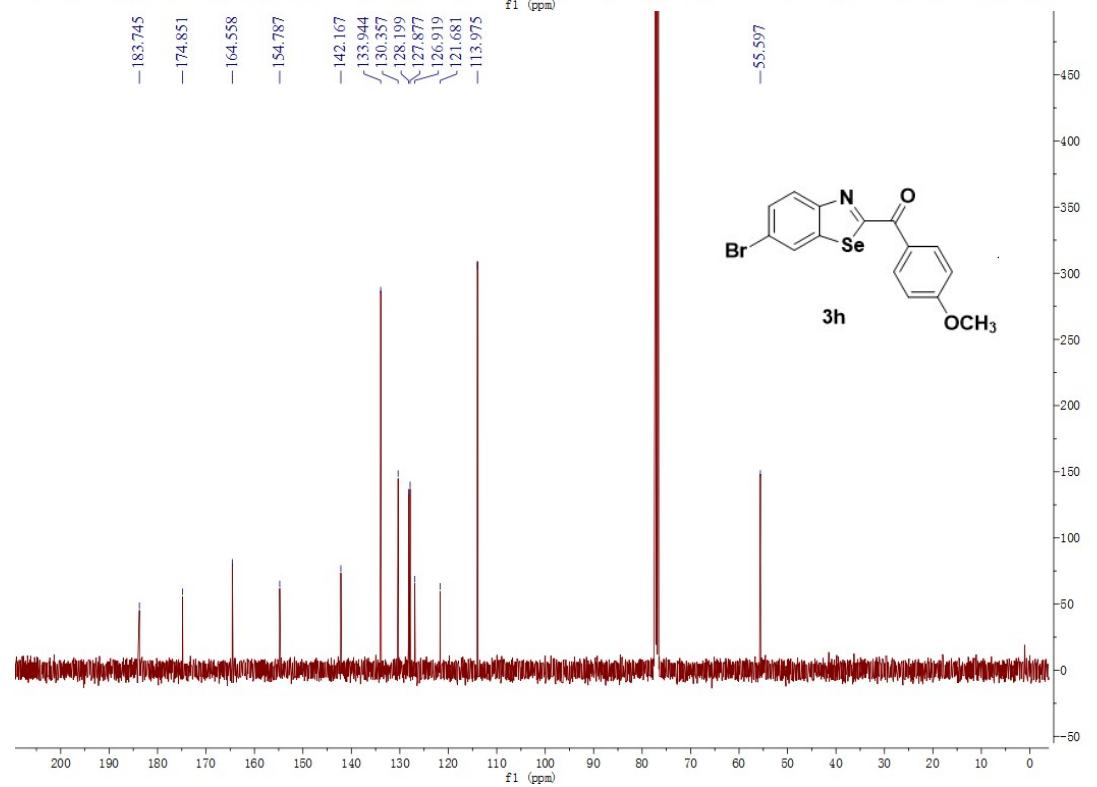

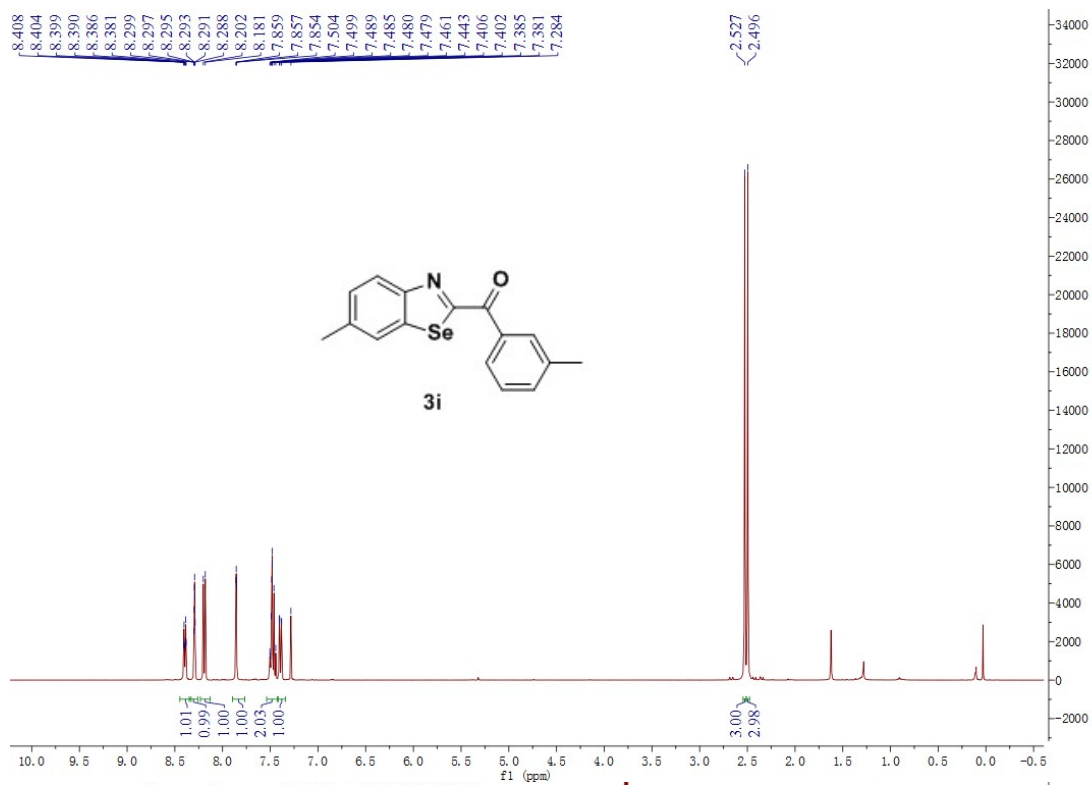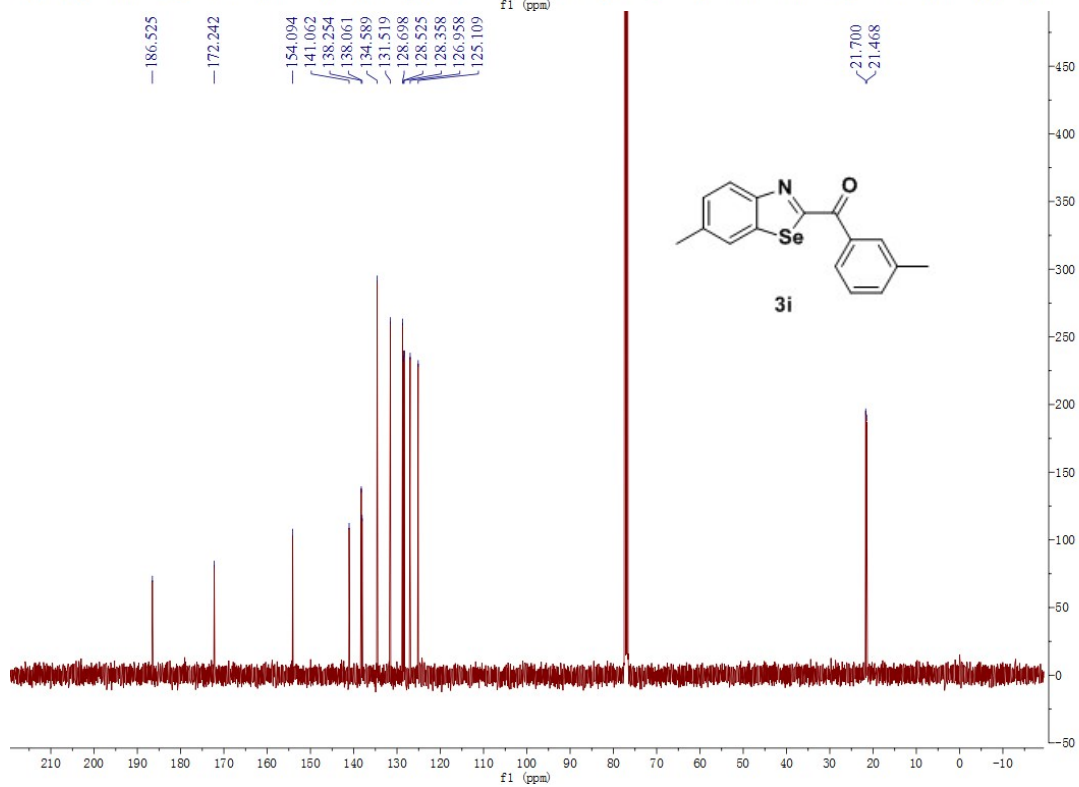

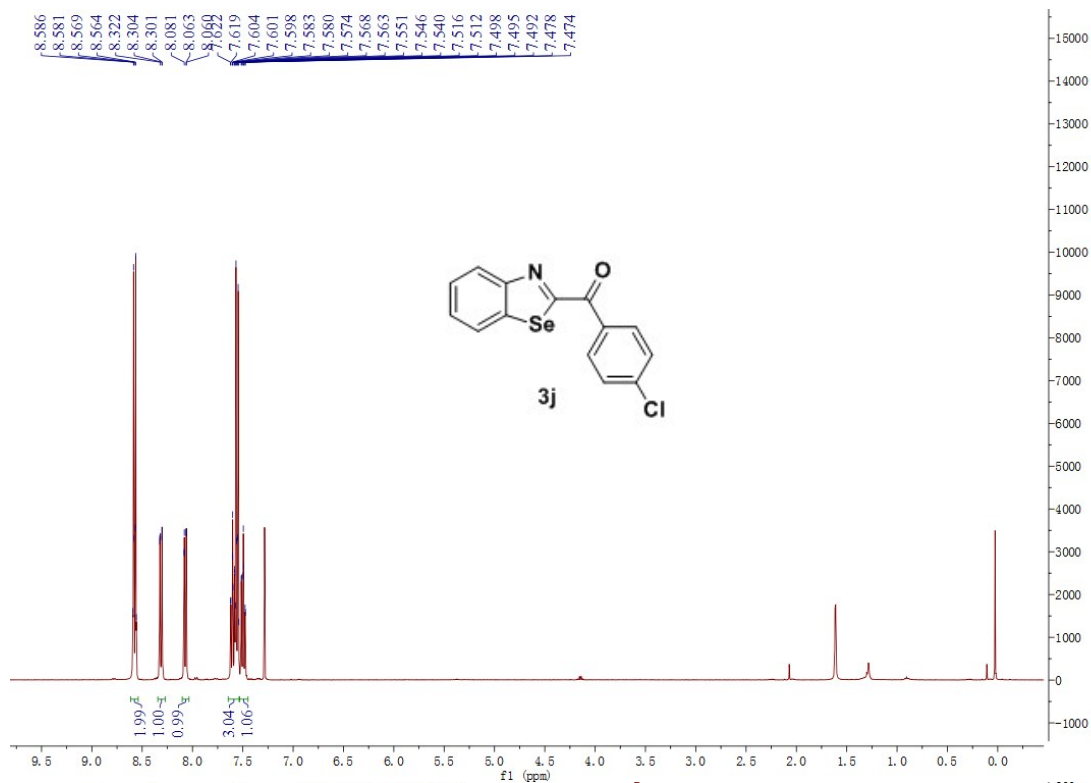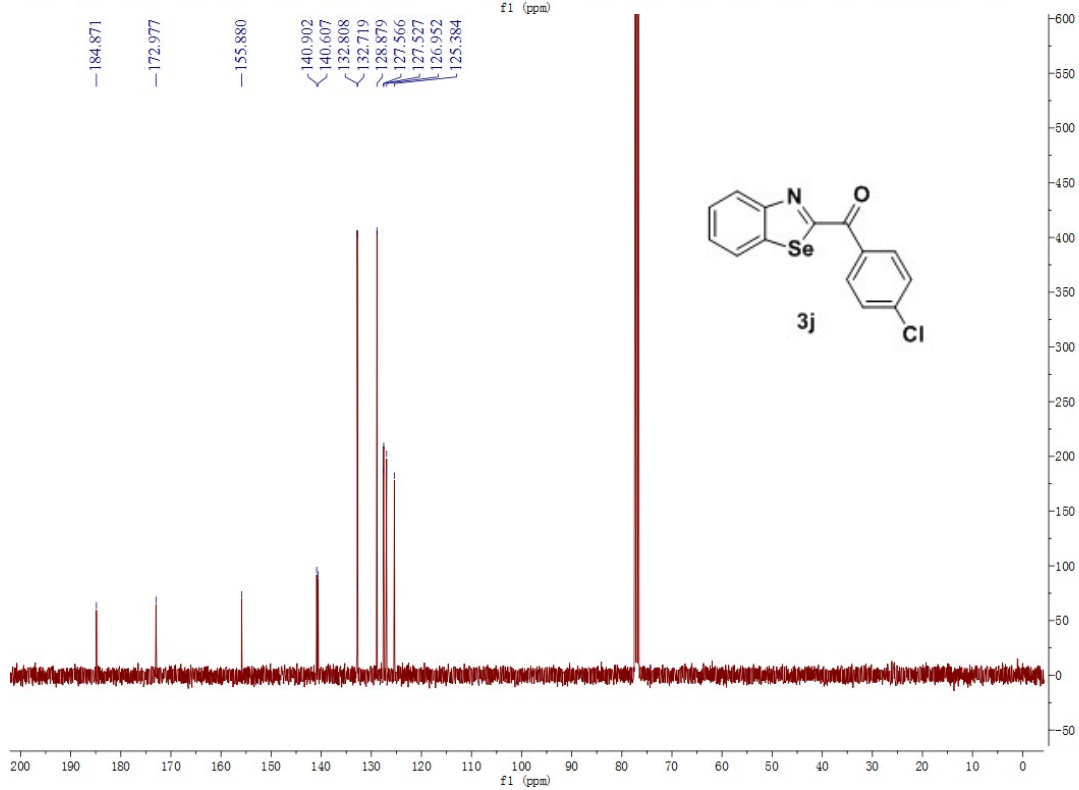

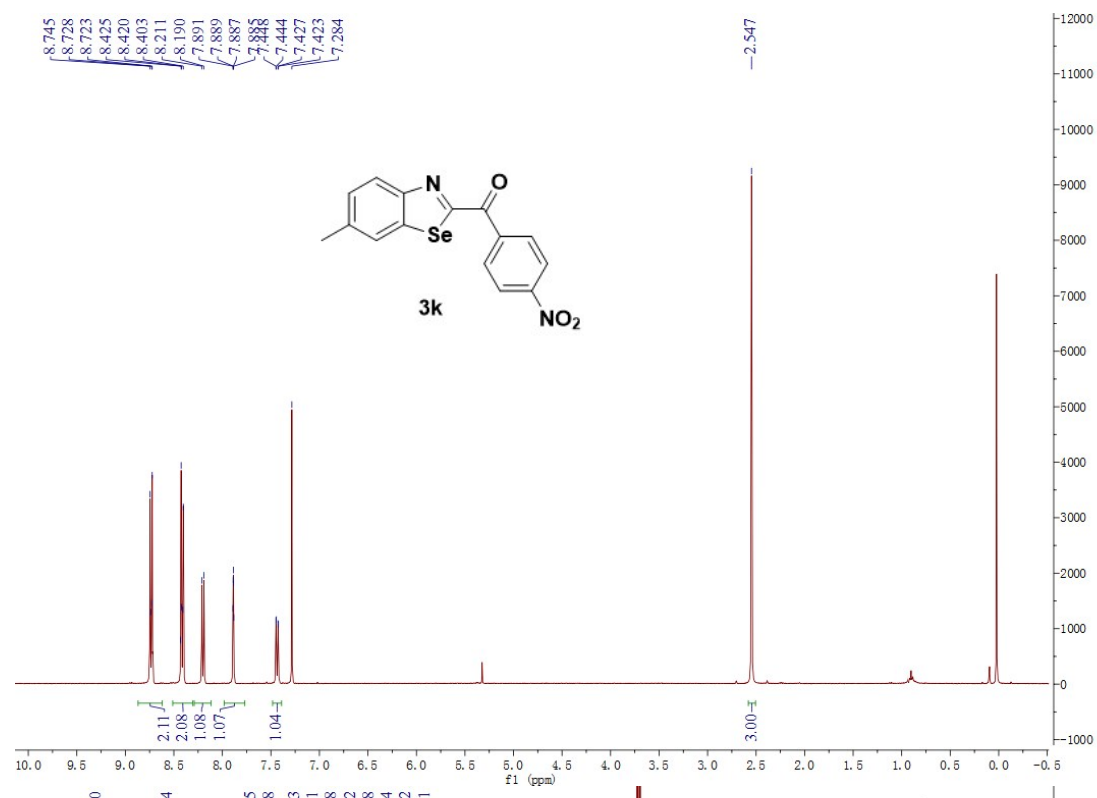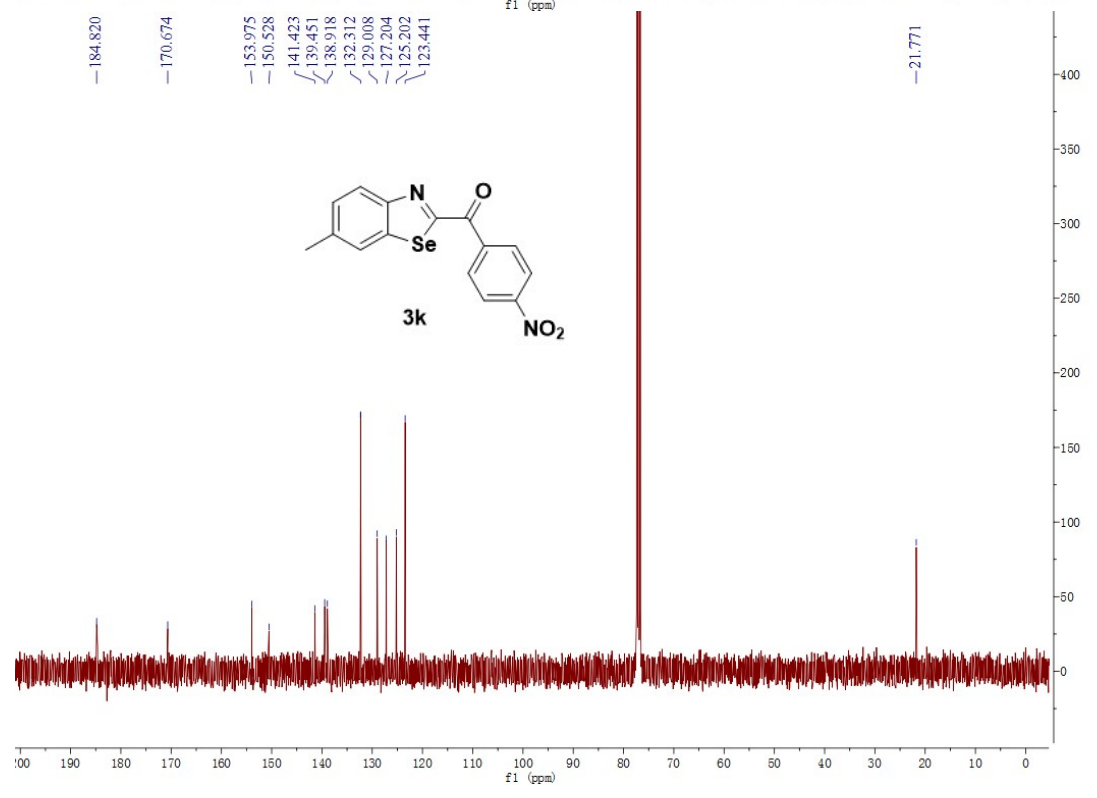

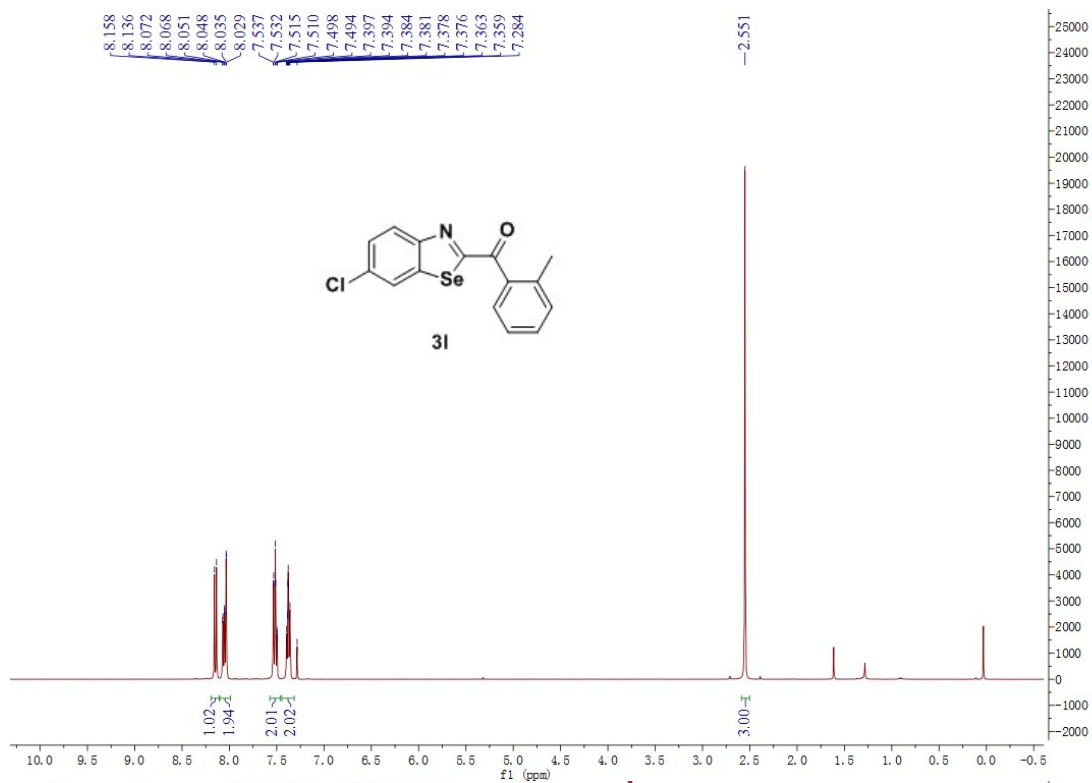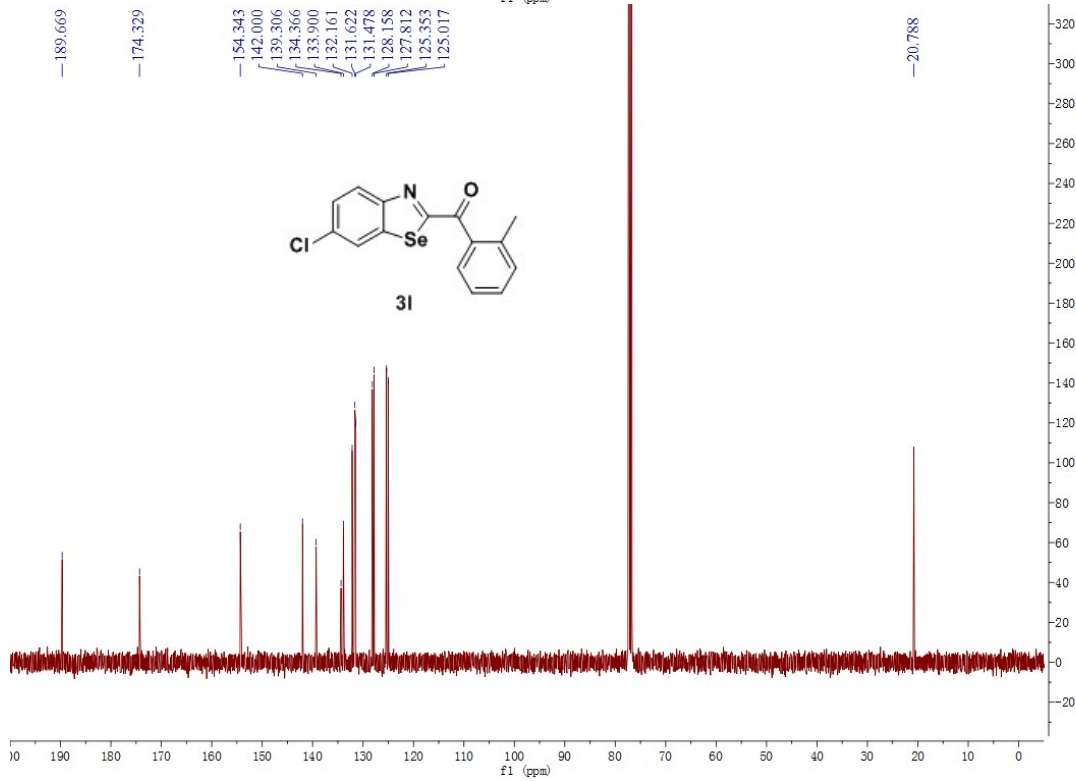



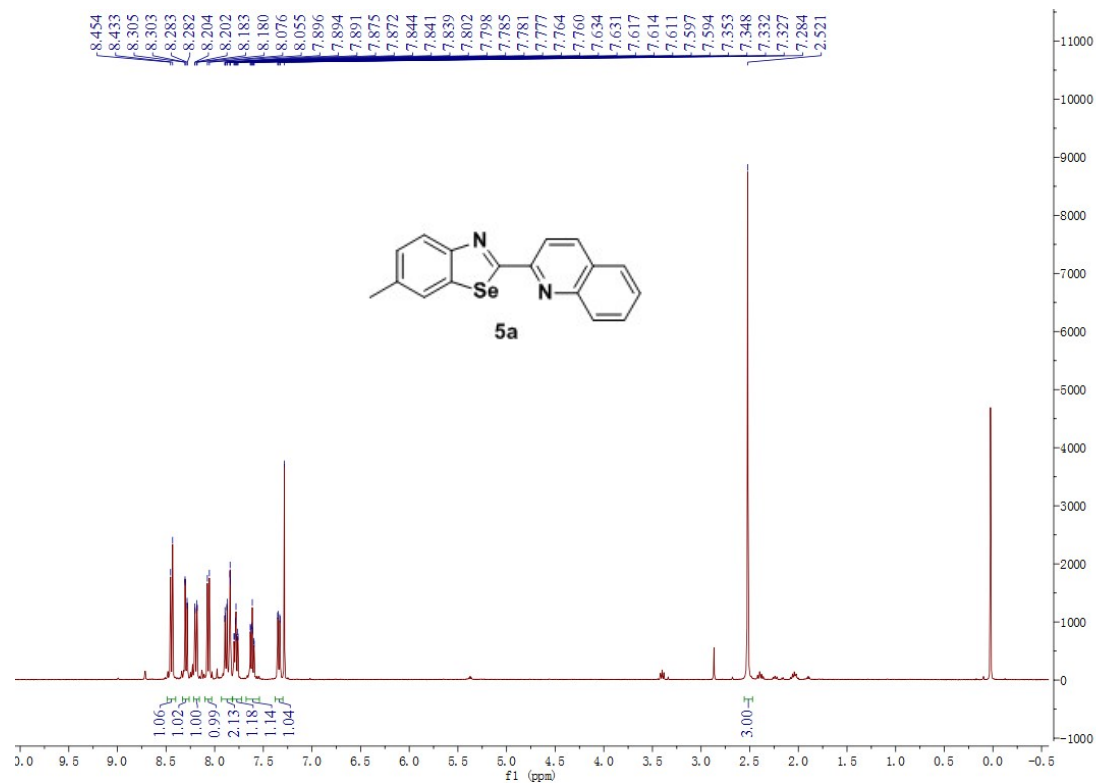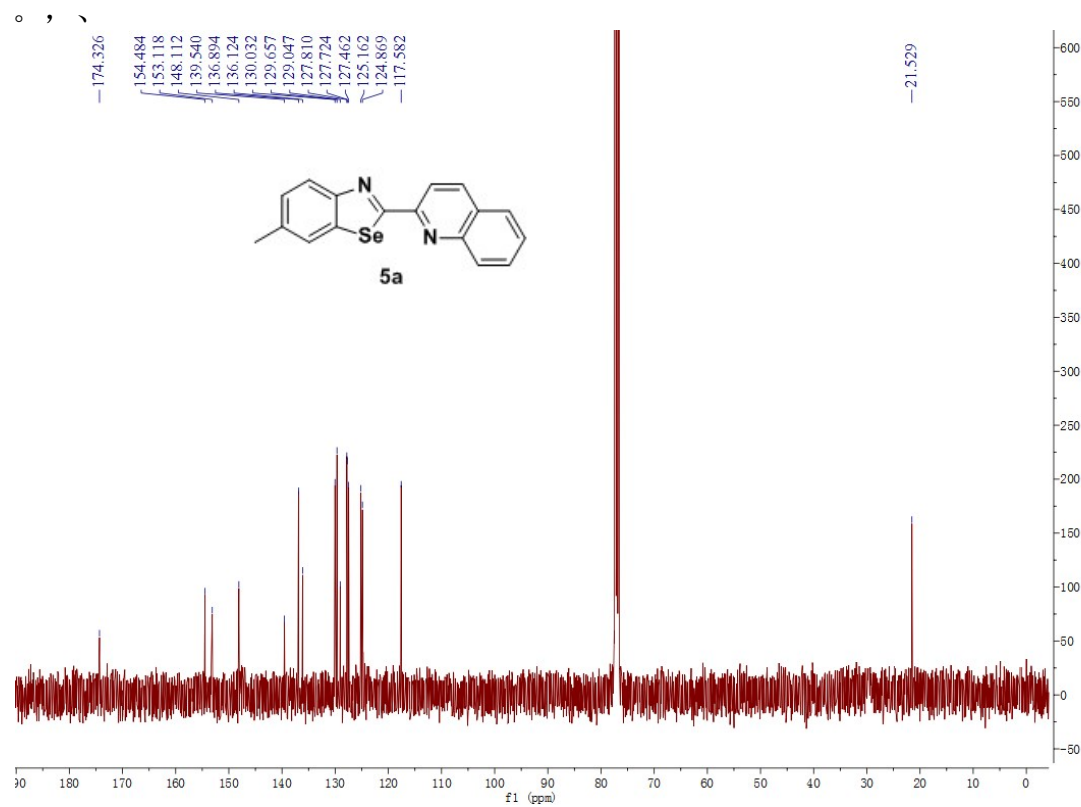

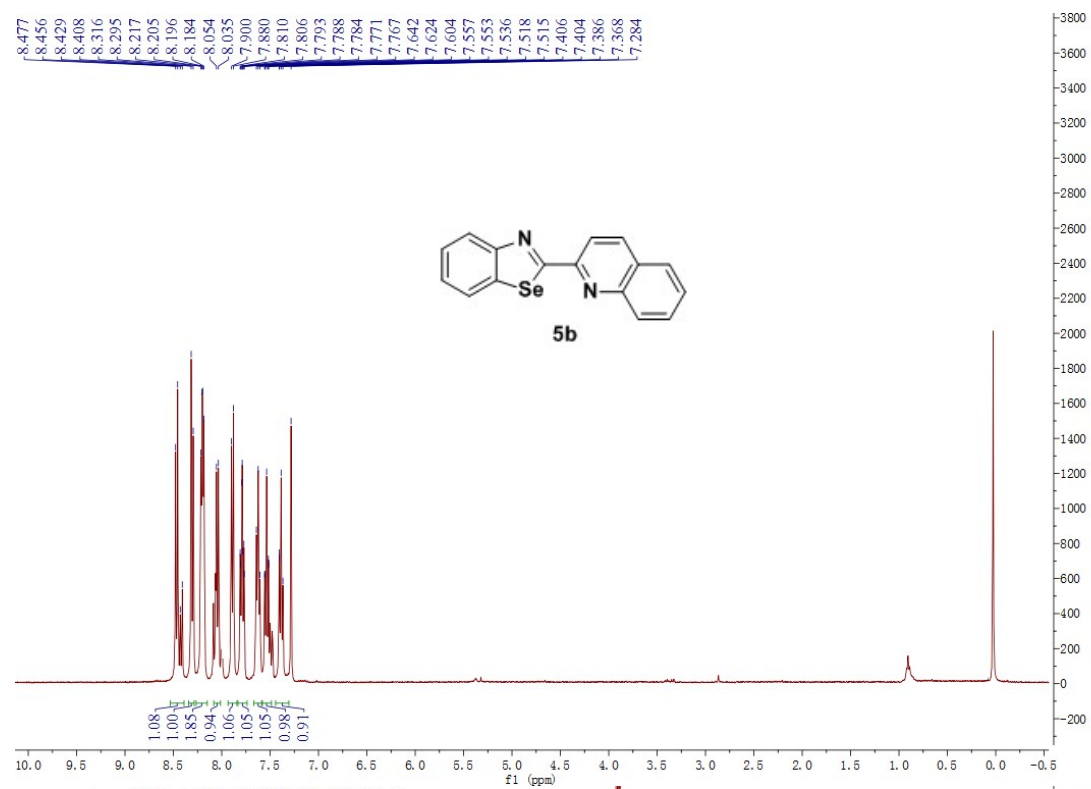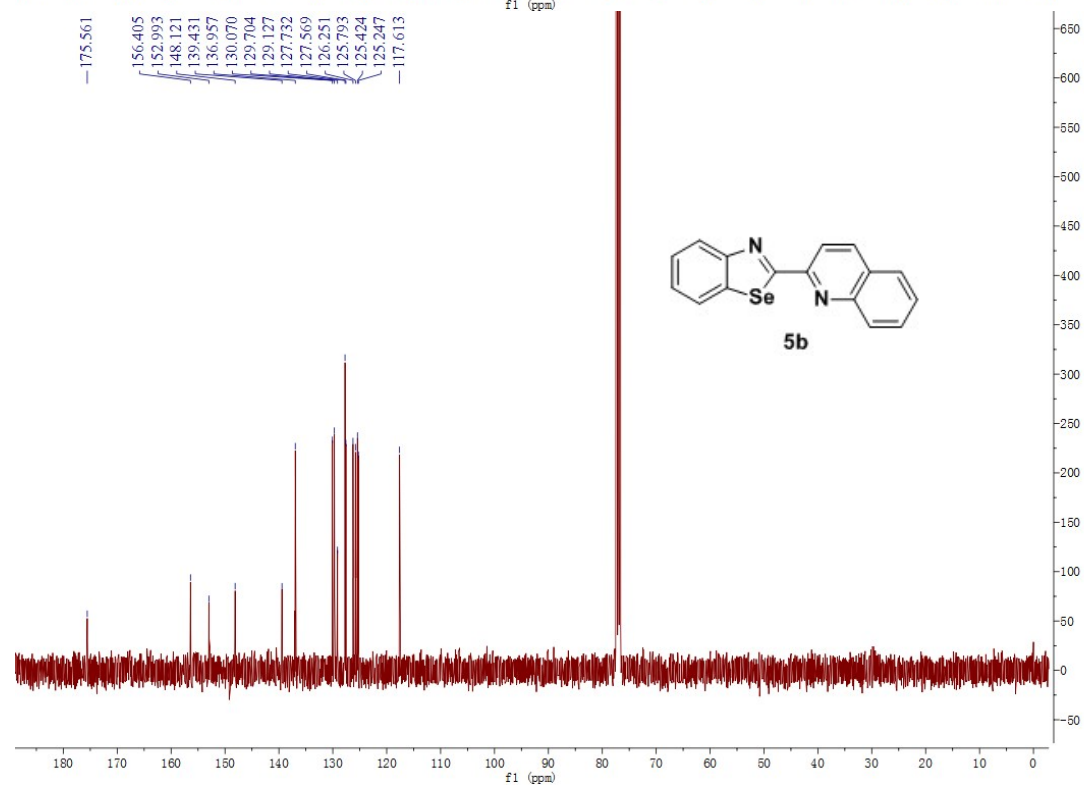

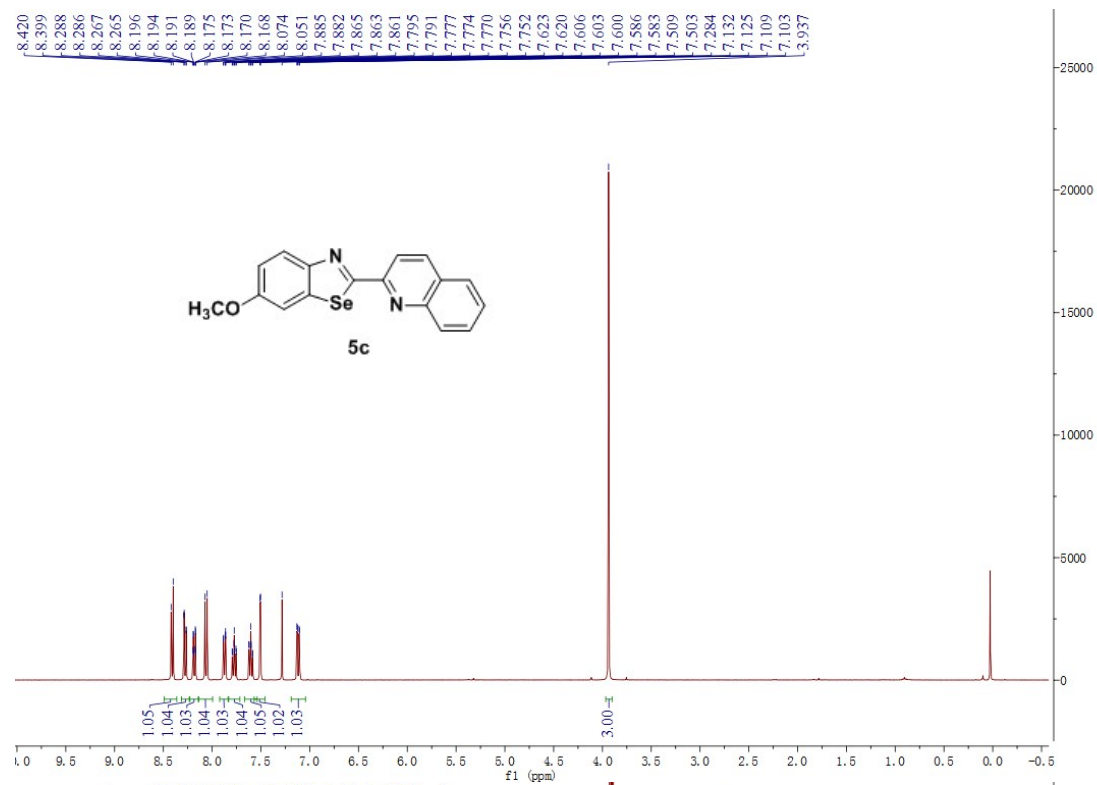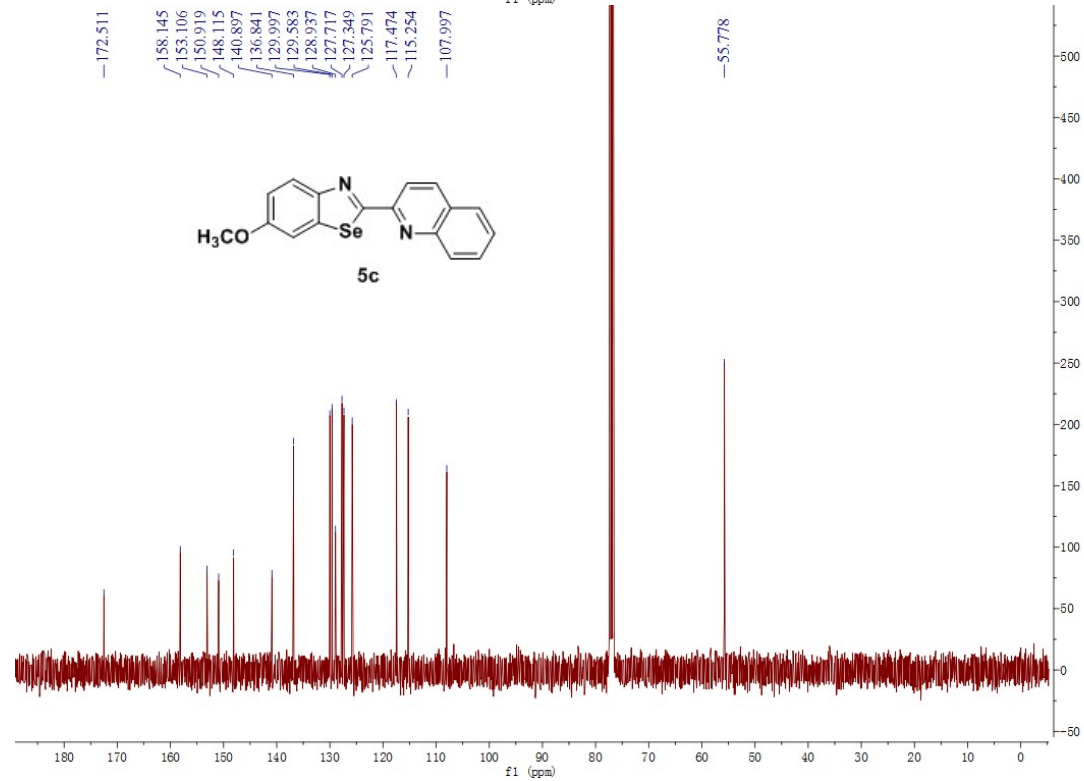

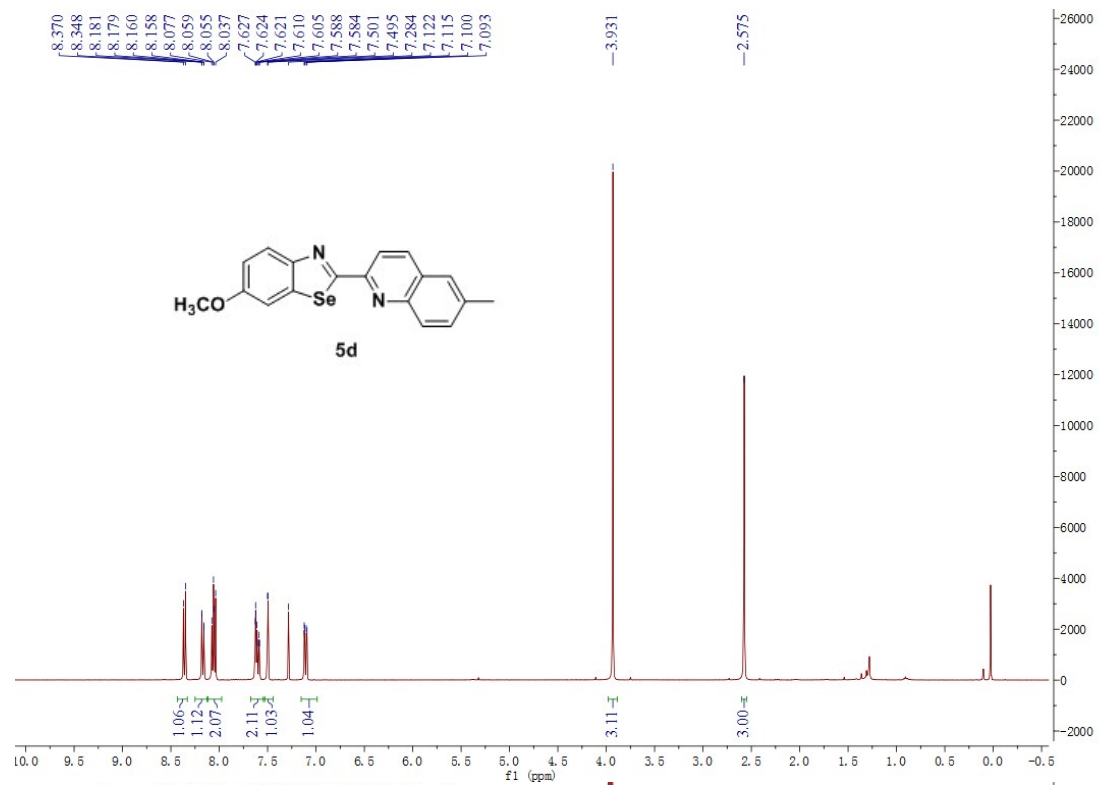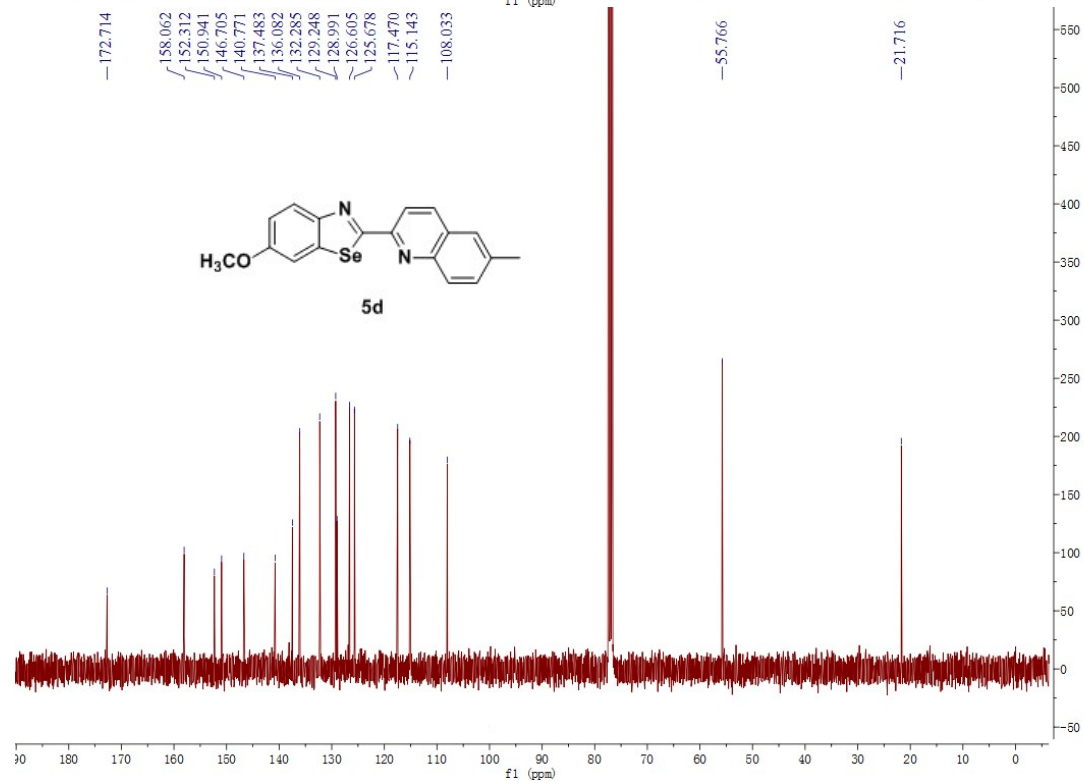

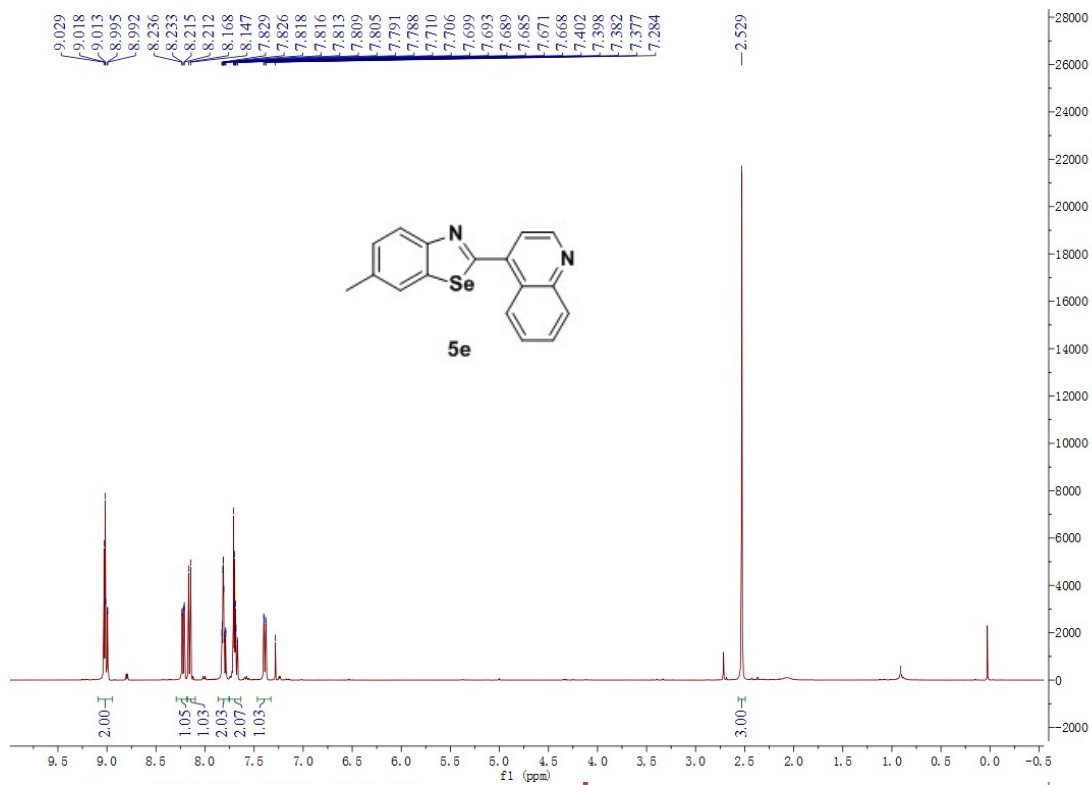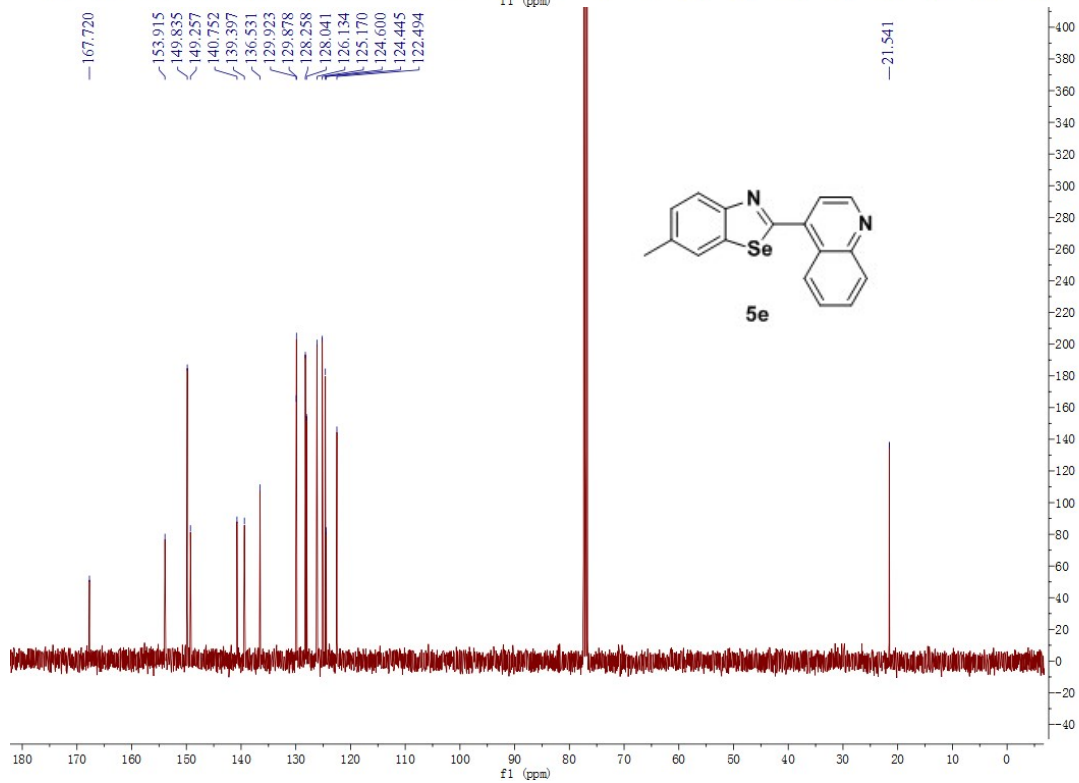

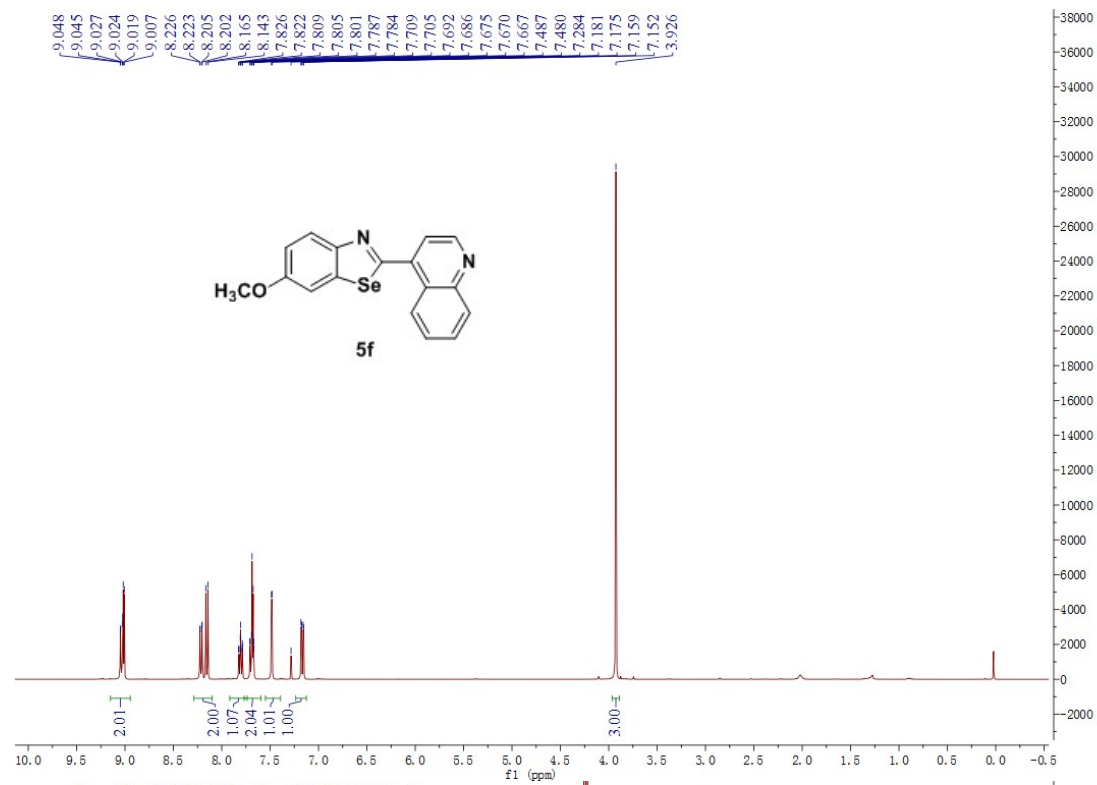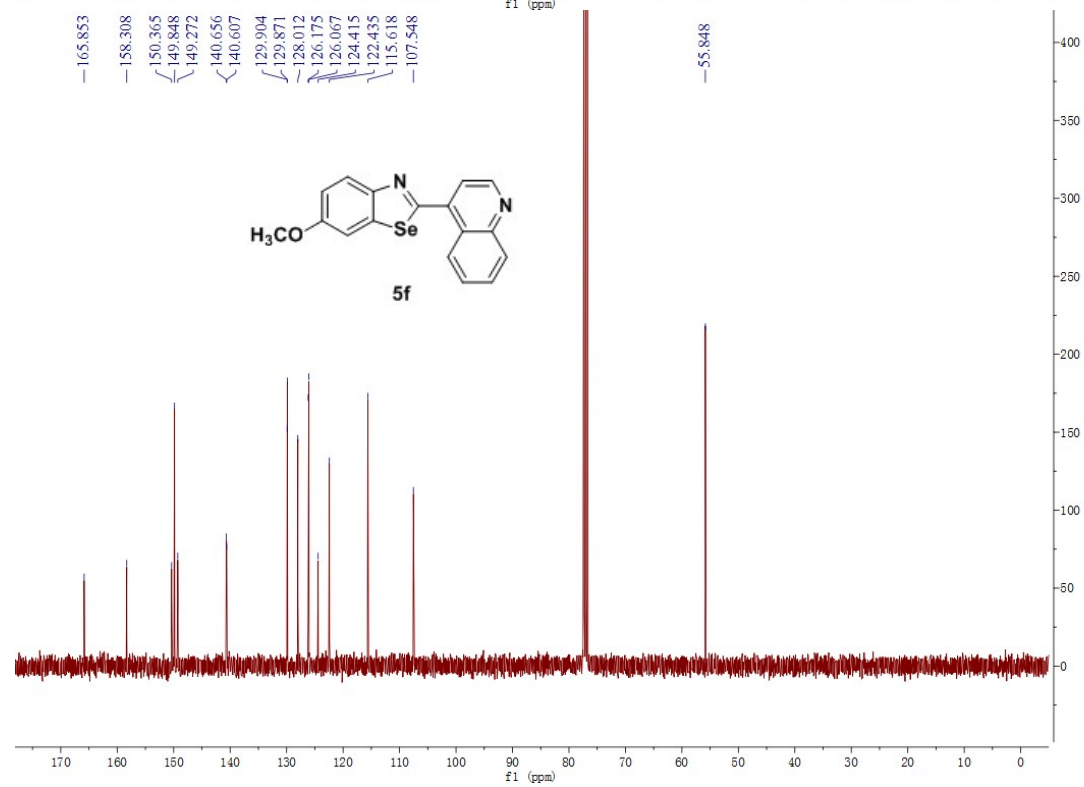

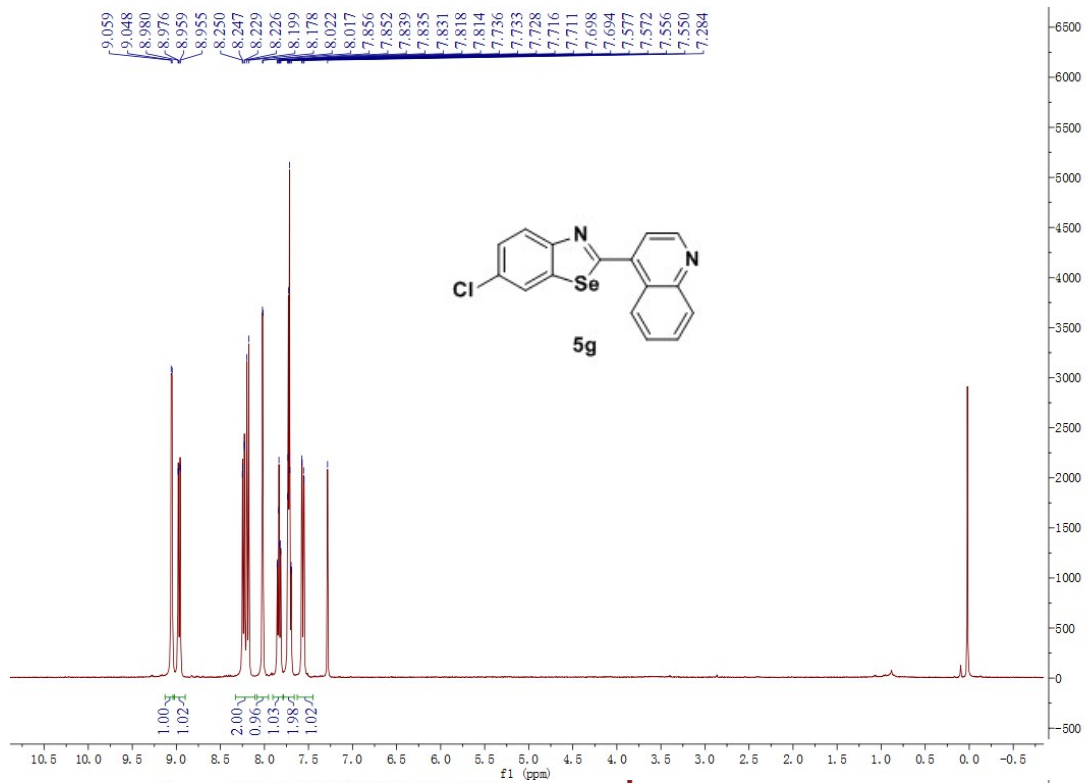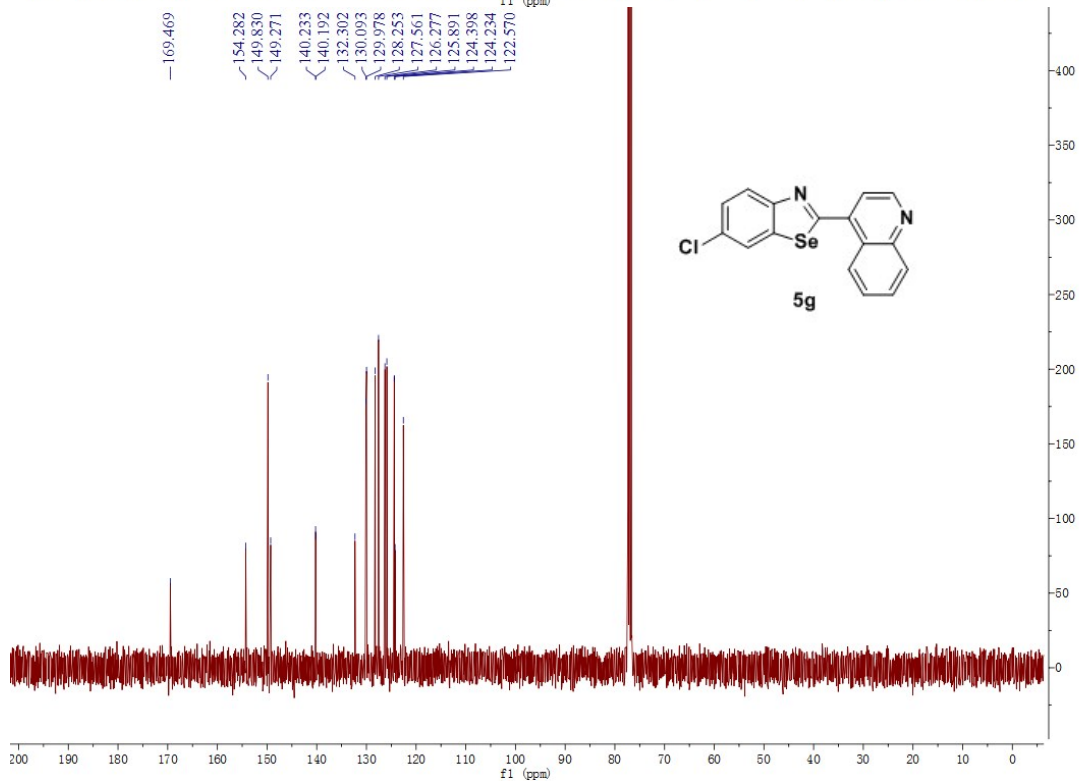

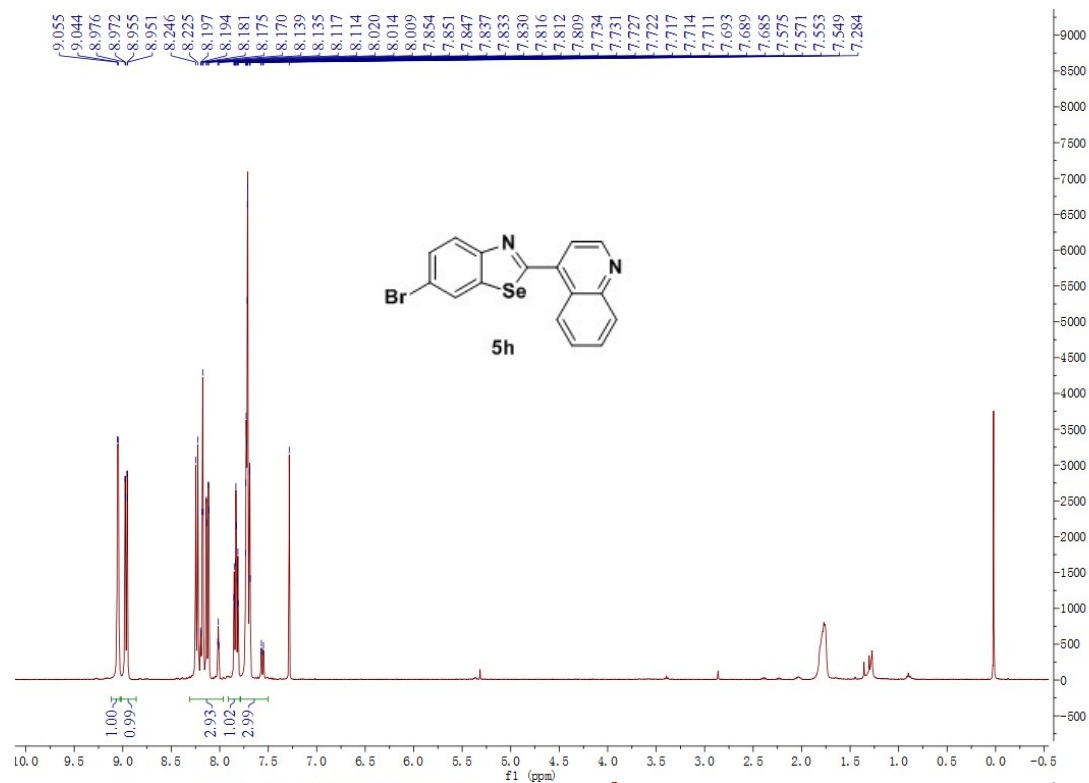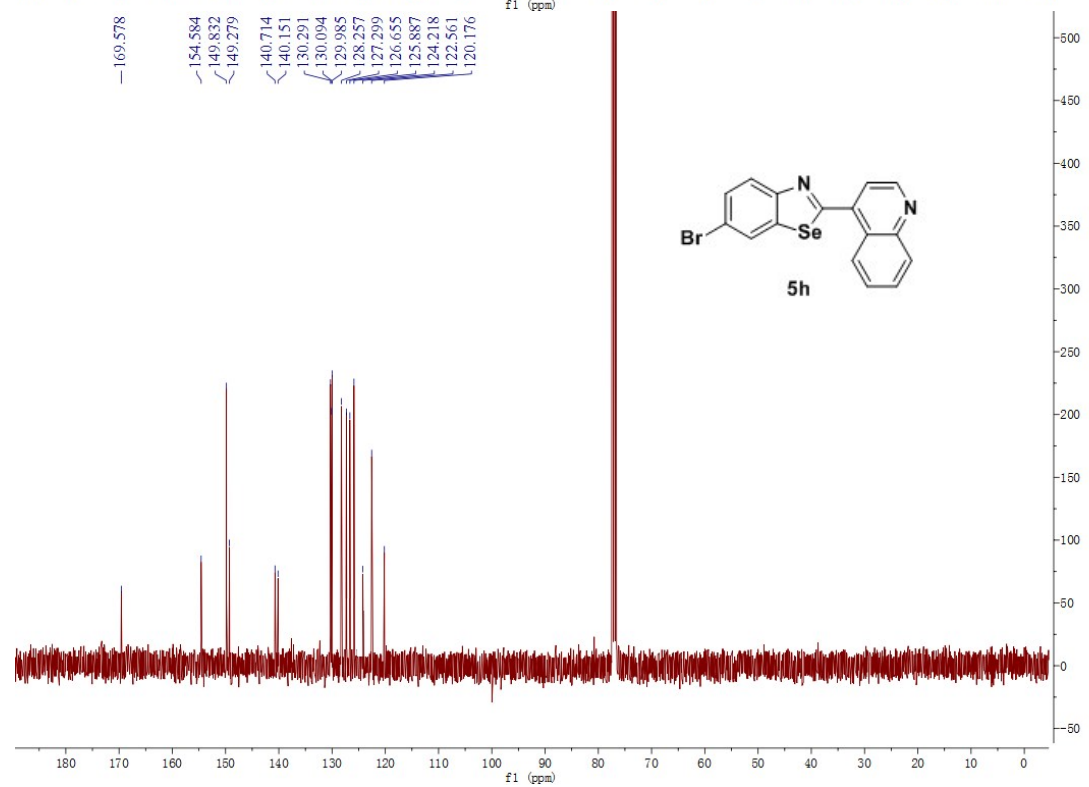



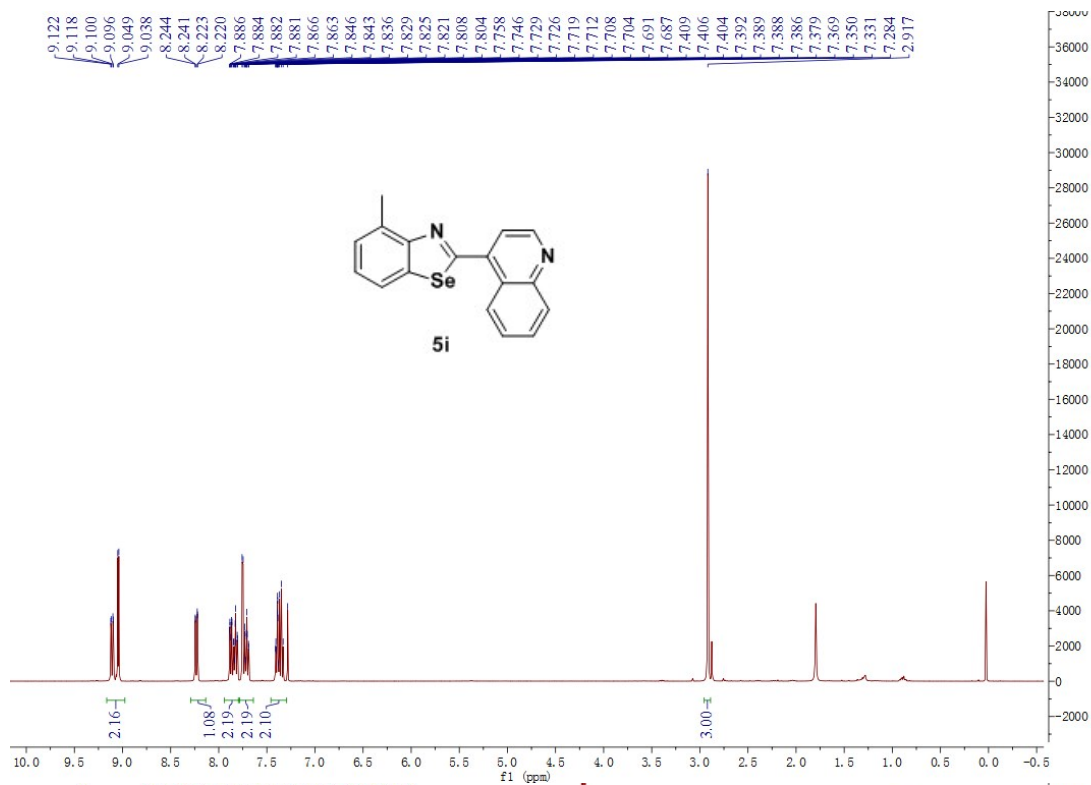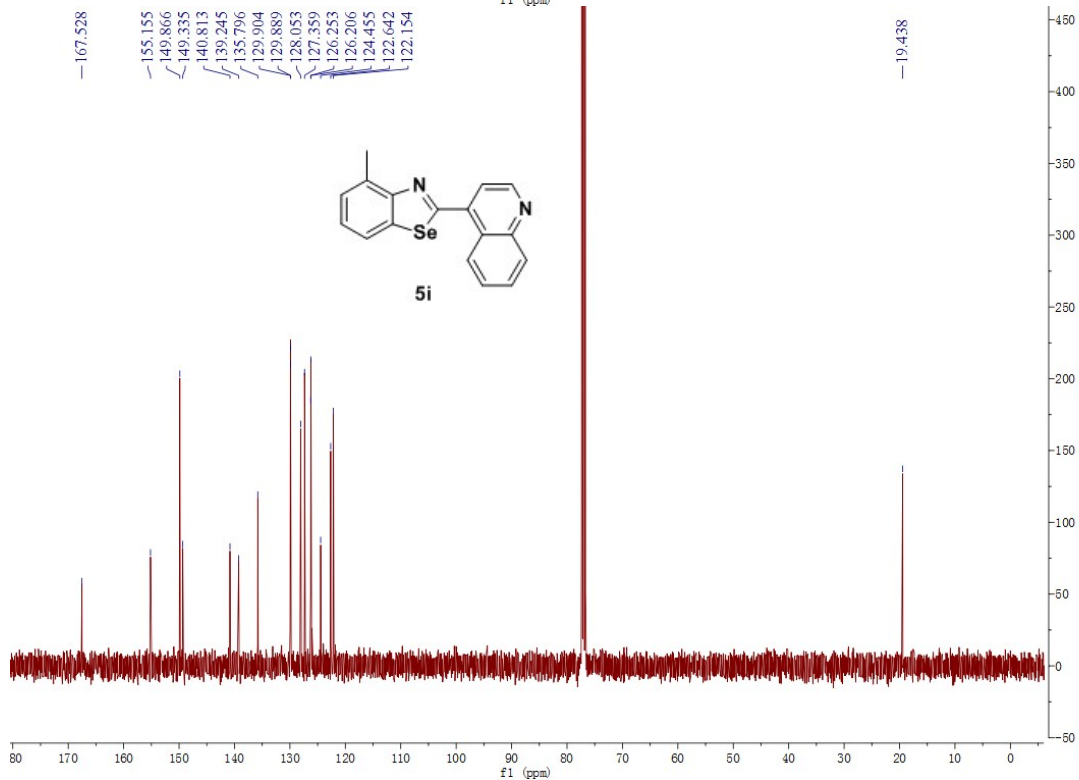

Supplement: d1ob01070k1.pdf [file d1ob01070k1.pdf]
